# Supplementary material for: Bioactive compounds from the seeds of Amomum tsaoko Crevost et Lemaire, a Chinese spice as inhibitors of sphingosine kinases, SPHK1/2
Source: PubMed Central journal article supplement — RSC Adv. 2019 Oct 22;9(58):33957–68. doi: 10.1039/c9ra07988b (PMC9073669; doi:10.1039/c9ra07988b), 2019-10-22
Supplement: RA-009-C9RA07988B-s001.pdf [file RA-009-C9RA07988B-s001.pdf]

## Electronic Supplementary Information

### **Bioactive compounds from the seeds of *Amomum tsaoko* Crevost et Lemaire, a Chinese spice as inhibitors of sphingosine kinases, SPHK1/2**

Seulah Lee,<sup>a,c</sup> Joo Chan Lee,<sup>a,c</sup> Lalita Subedi,<sup>b</sup> Kyo Hee Cho,<sup>b</sup> Sun Yeou Kim,<sup>b</sup> Hyun-Ju Park,<sup>a</sup> and Ki Hyun Kim<sup>\*a</sup>

<sup>a</sup>School of Pharmacy, Sungkyunkwan University, Suwon 16419, Republic of Korea

<sup>b</sup>College of Pharmacy, Gachon University; 191 Hambakmoero, Yeonsu-gu, Incheon 21936, Republic of Korea

<sup>c</sup>Both authors contributed equally to this work

\* Corresponding author:

Ki Hyun Kim, Tel: +82-31-290-7700; Fax: +82-31-290-7730; E-mail: khkim83@skku.edu

## Supporting Information Contents:

|                                                                                                 |     |
|-------------------------------------------------------------------------------------------------|-----|
| Figure S1. HR-ESIMS data of <b>1</b> .....                                                      | S4  |
| Figure S2. <sup>1</sup> H NMR spectrum of <b>1</b> (CDCl <sub>3</sub> , 700 MHz).....           | S5  |
| Figure S3. <sup>13</sup> C NMR spectrum of <b>1</b> (CDCl <sub>3</sub> , 175 MHz).....          | S6  |
| Figure S4. <sup>1</sup> H- <sup>1</sup> H COSY spectrum of <b>1</b> (CDCl <sub>3</sub> ).....   | S7  |
| Figure S5. HSQC spectrum of <b>1</b> (CDCl <sub>3</sub> ).....                                  | S8  |
| Figure S6. HMBC spectrum of <b>1</b> (CDCl <sub>3</sub> ).....                                  | S9  |
| Figure S7. HR-ESIMS data of <b>2</b> .....                                                      | S10 |
| Figure S8. <sup>1</sup> H NMR spectrum of <b>2</b> (CDCl <sub>3</sub> , 700 MHz).....           | S11 |
| Figure S9. <sup>13</sup> C NMR spectrum of <b>2</b> (CDCl <sub>3</sub> , 175 MHz).....          | S12 |
| Figure S10. TOCSY spectrum of <b>2</b> (CDCl <sub>3</sub> ).....                                | S13 |
| Figure S11. HSQC spectrum of <b>2</b> (CDCl <sub>3</sub> ).....                                 | S14 |
| Figure S12. HMBC spectrum of <b>2</b> (CDCl <sub>3</sub> ).....                                 | S15 |
| Figure S13. HR-ESIMS data of <b>5</b> .....                                                     | S16 |
| Figure S14. <sup>1</sup> H NMR spectrum of <b>5</b> (CDCl <sub>3</sub> , 600 MHz).....          | S17 |
| Figure S15. <sup>13</sup> C NMR spectrum of <b>5</b> (CDCl <sub>3</sub> , 150 MHz).....         | S18 |
| Figure S16. <sup>1</sup> H- <sup>1</sup> H COSY spectrum of <b>5</b> (CDCl <sub>3</sub> ).....  | S19 |
| Figure S17. HSQC spectrum of <b>5</b> (CDCl <sub>3</sub> ).....                                 | S20 |
| Figure S18. HMBC spectrum of <b>5</b> (CDCl <sub>3</sub> ).....                                 | S21 |
| Figure S19. MS/MS analysis of <b>5</b> (MS <sup>2</sup> 265 → full-scan).....                   | S22 |
| Figure S20. LC/MS data of acylated derivative from CEA reaction of <b>5</b> .....               | S23 |
| Figure S21. HR-ESIMS data of <b>10</b> .....                                                    | S25 |
| Figure S22. <sup>1</sup> H NMR spectrum of <b>10</b> (CD <sub>3</sub> OD, 850 MHz).....         | S26 |
| Figure S23. <sup>1</sup> H- <sup>1</sup> H COSY spectrum of <b>10</b> (CD <sub>3</sub> OD)..... | S27 |
| Figure S24. HSQC spectrum of <b>10</b> (CD <sub>3</sub> OD).....                                | S28 |
| Figure S25. HMBC spectrum of <b>10</b> (CD <sub>3</sub> OD).....                                | S29 |
| Figure S26. HR-ESIMS data of <b>11</b> .....                                                    | S30 |
| Figure S27. <sup>1</sup> H NMR spectrum of <b>11</b> (CD <sub>3</sub> OD, 800 MHz).....         | S31 |
| Figure S28. <sup>1</sup> H- <sup>1</sup> H COSY spectrum of <b>11</b> (CD <sub>3</sub> OD)..... | S32 |
| Figure S29. HSQC spectrum of <b>11</b> (CD <sub>3</sub> OD).....                                | S33 |

Figure S30. HMBC spectrum of **11** (CD<sub>3</sub>OD).....S34

Figure S31. Amino acid sequence alignment of human SPHK1(PDB id : 3VZD) and human SPHK2 using the homology modeling module embedded in the Schrodinger Maestro 11.6 software).....S35

Figure S1. HR-ESIMS data of 1

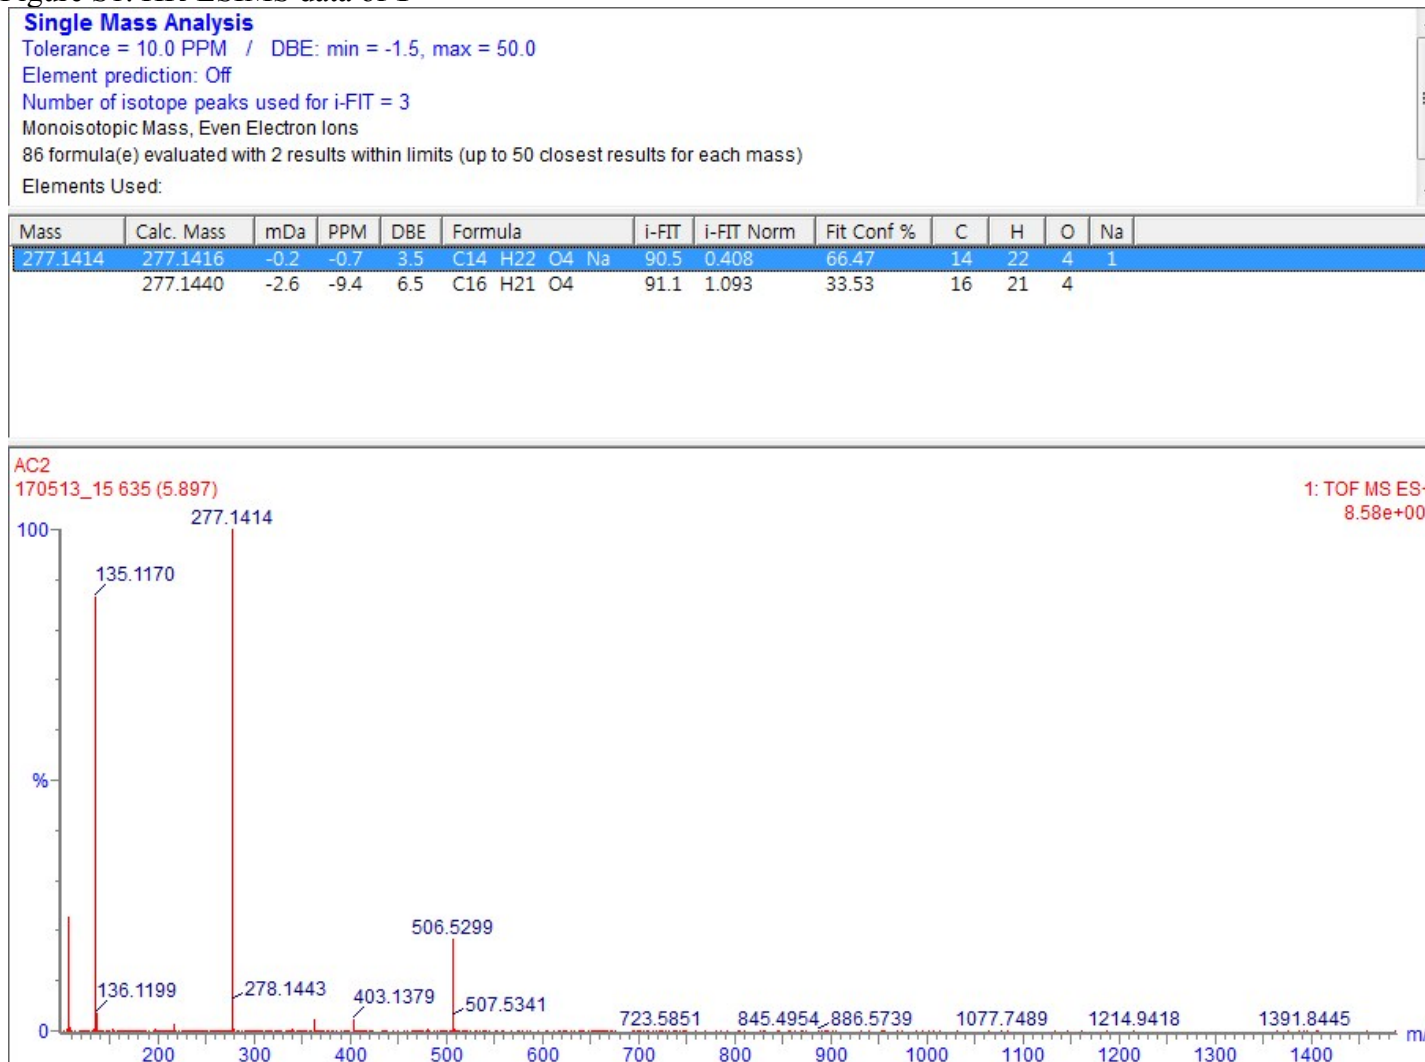

Figure S2.  $^1\text{H}$  NMR spectrum of **1** ( $\text{CDCl}_3$ , 700 MHz)

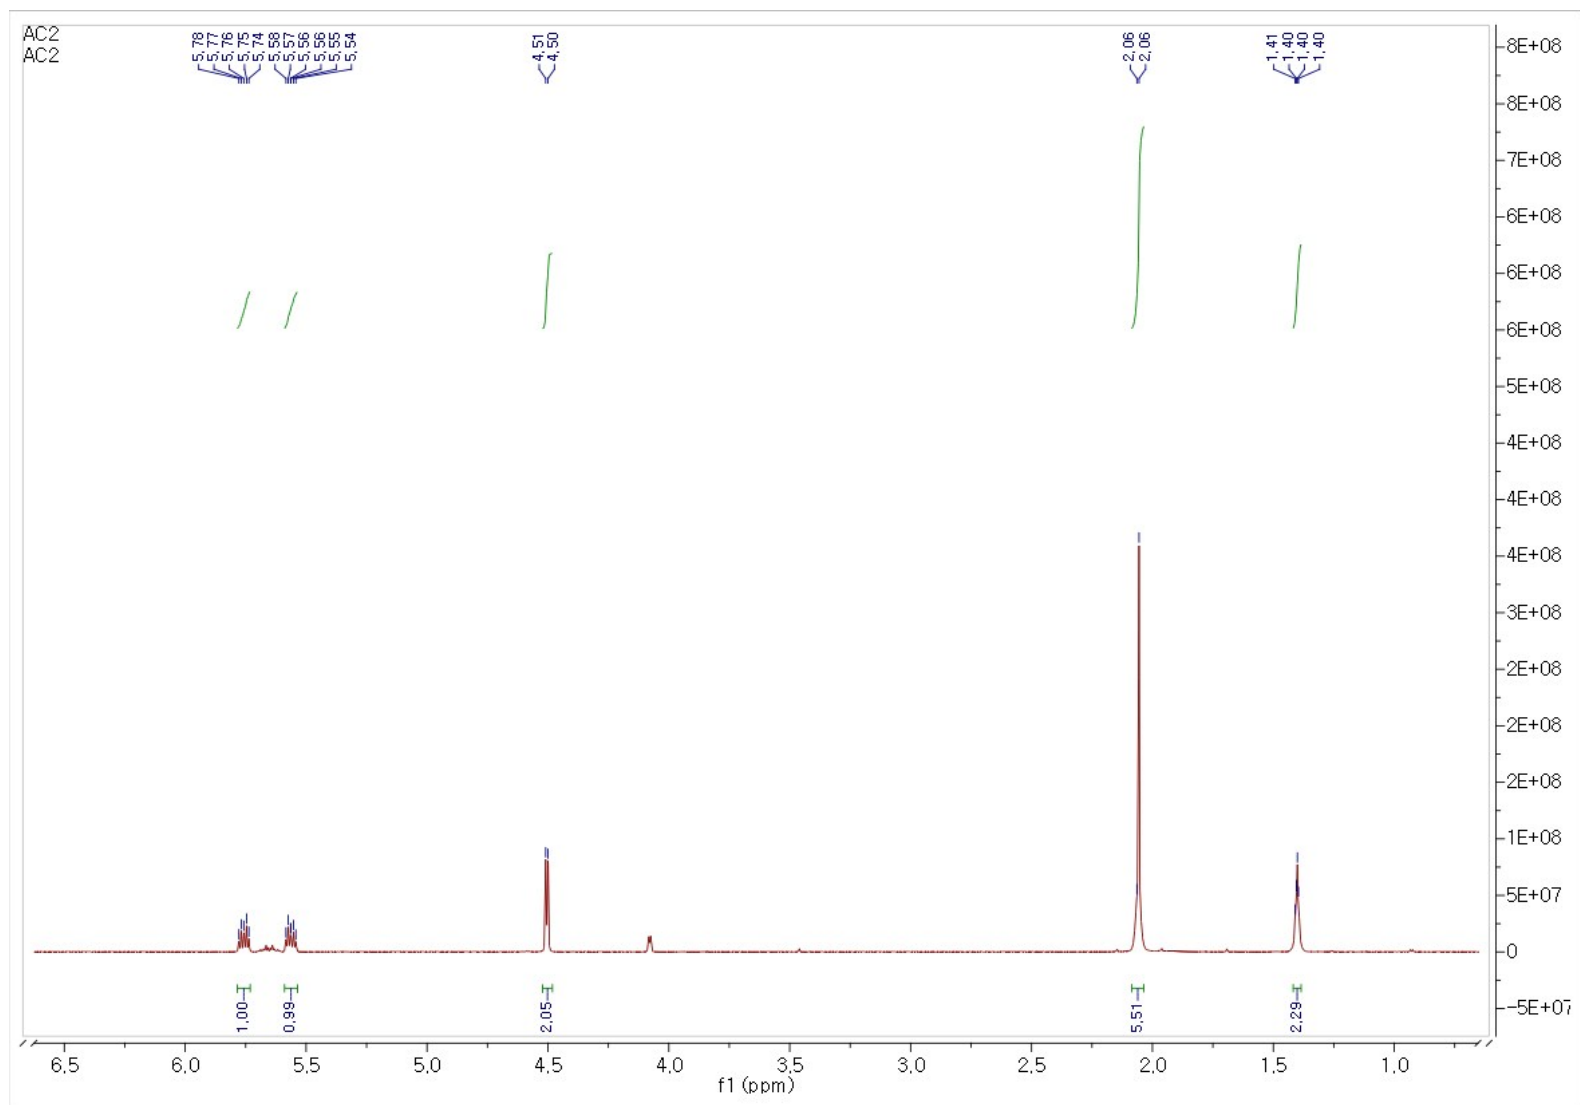

Figure S3.  $^{13}\text{C}$  NMR spectrum of **1** ( $\text{CDCl}_3$ , 175 Hz)

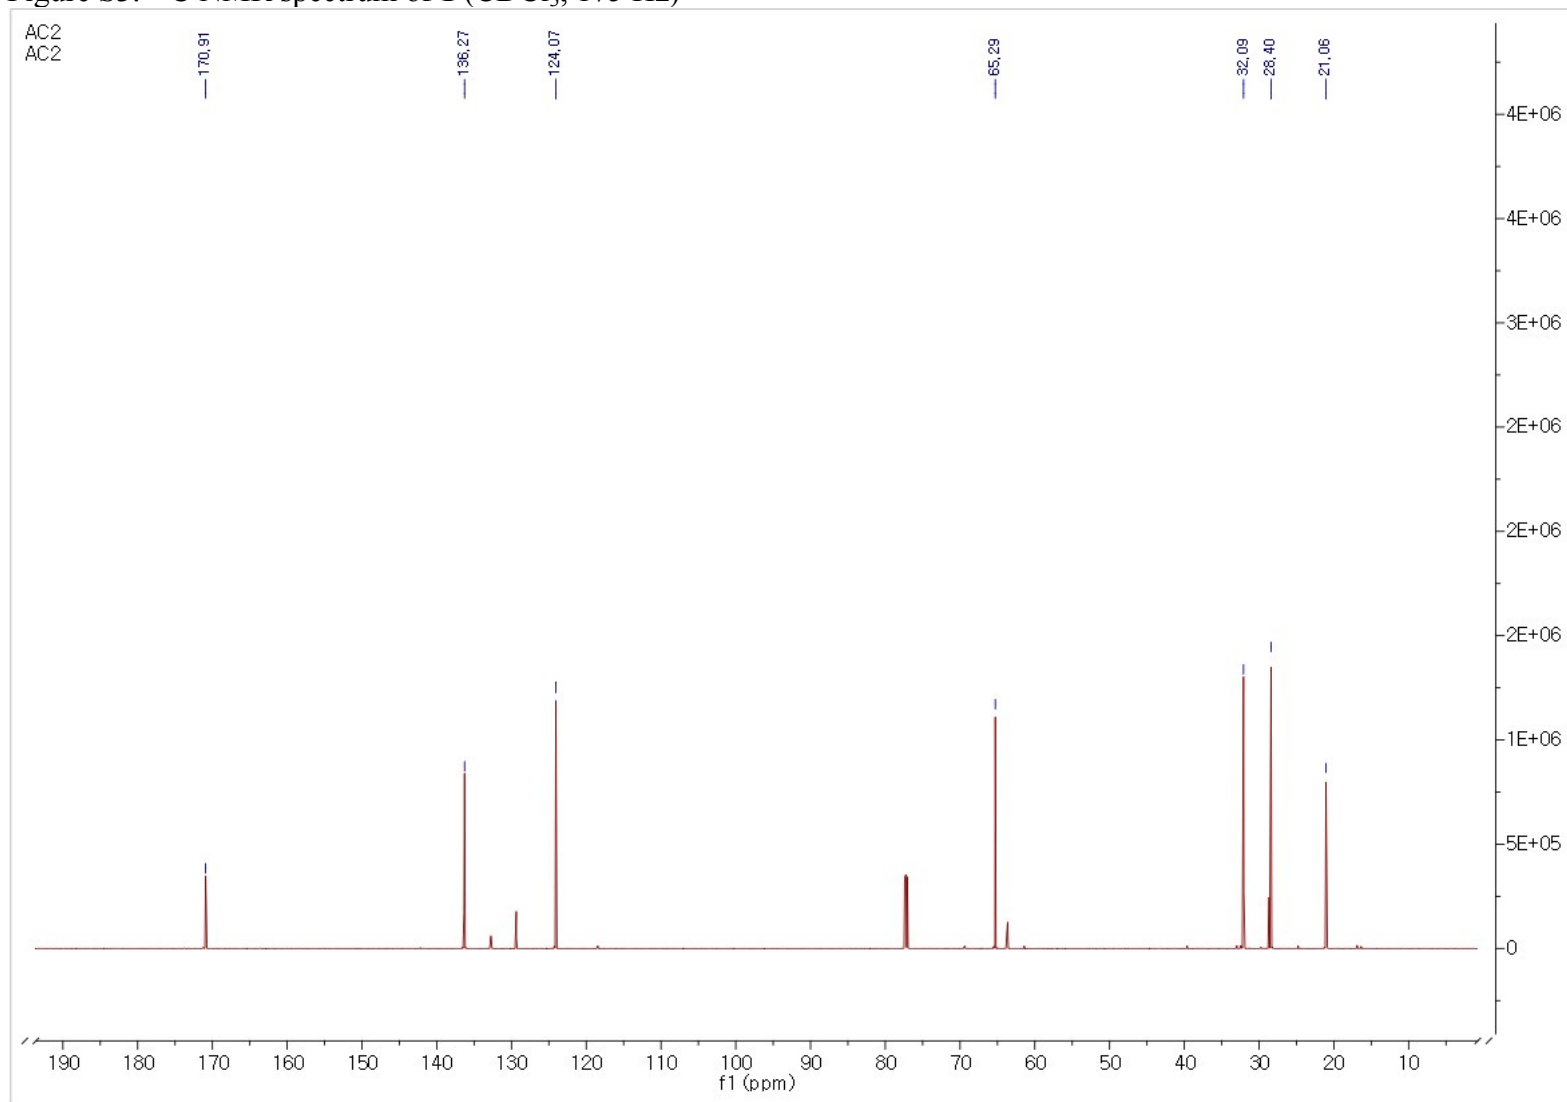

Figure S4.  $^1\text{H}$ - $^1\text{H}$  COSY spectrum of **1** ( $\text{CDCl}_3$ )

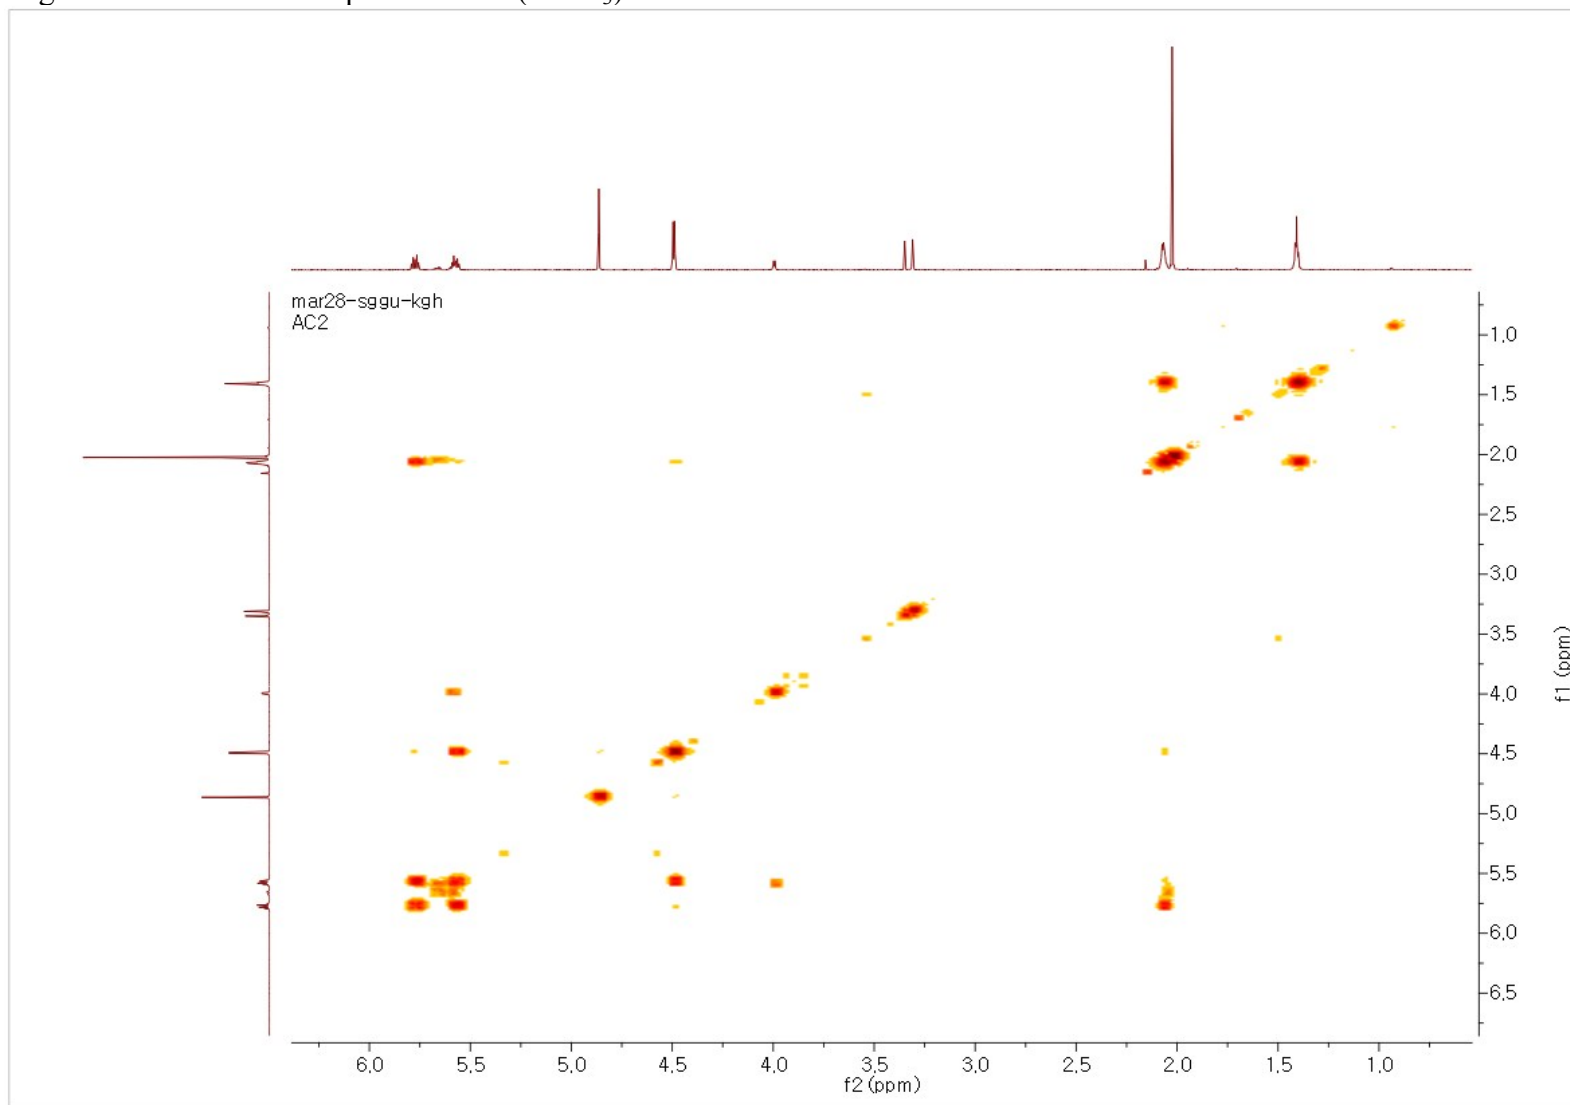

Figure S5. HSQC spectrum of **1** (CDCl<sub>3</sub>)

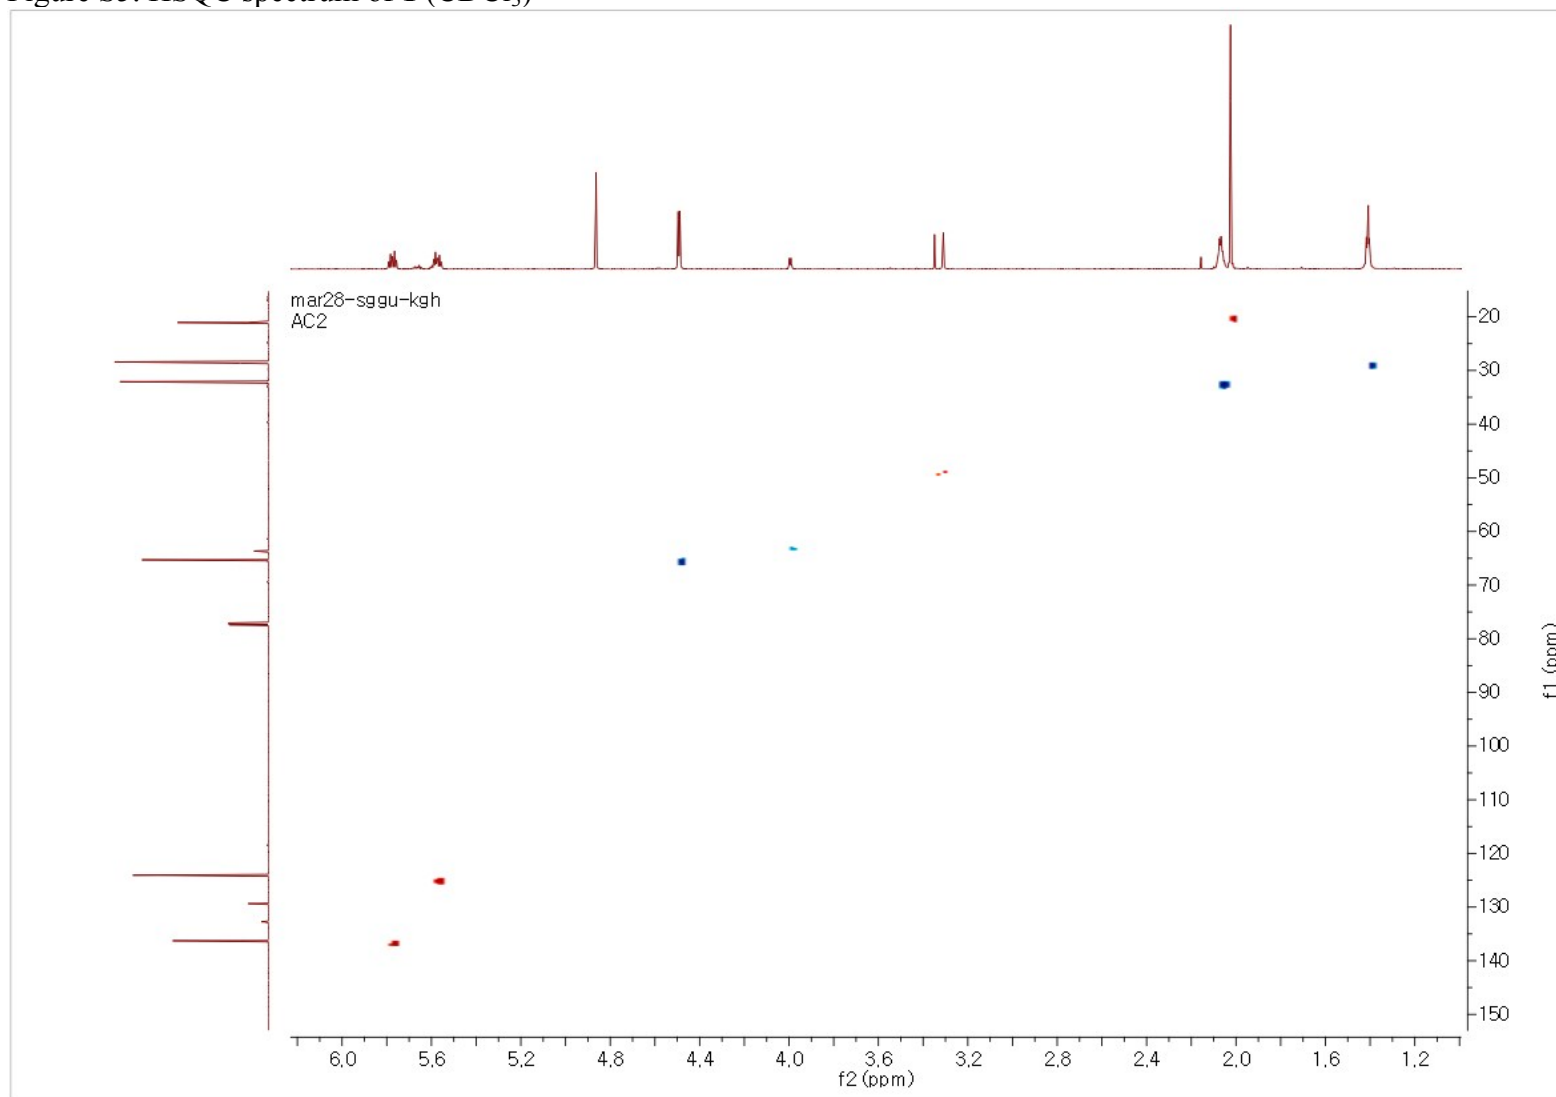



Figure S6. HMBC spectrum of **1** (CDCl<sub>3</sub>)

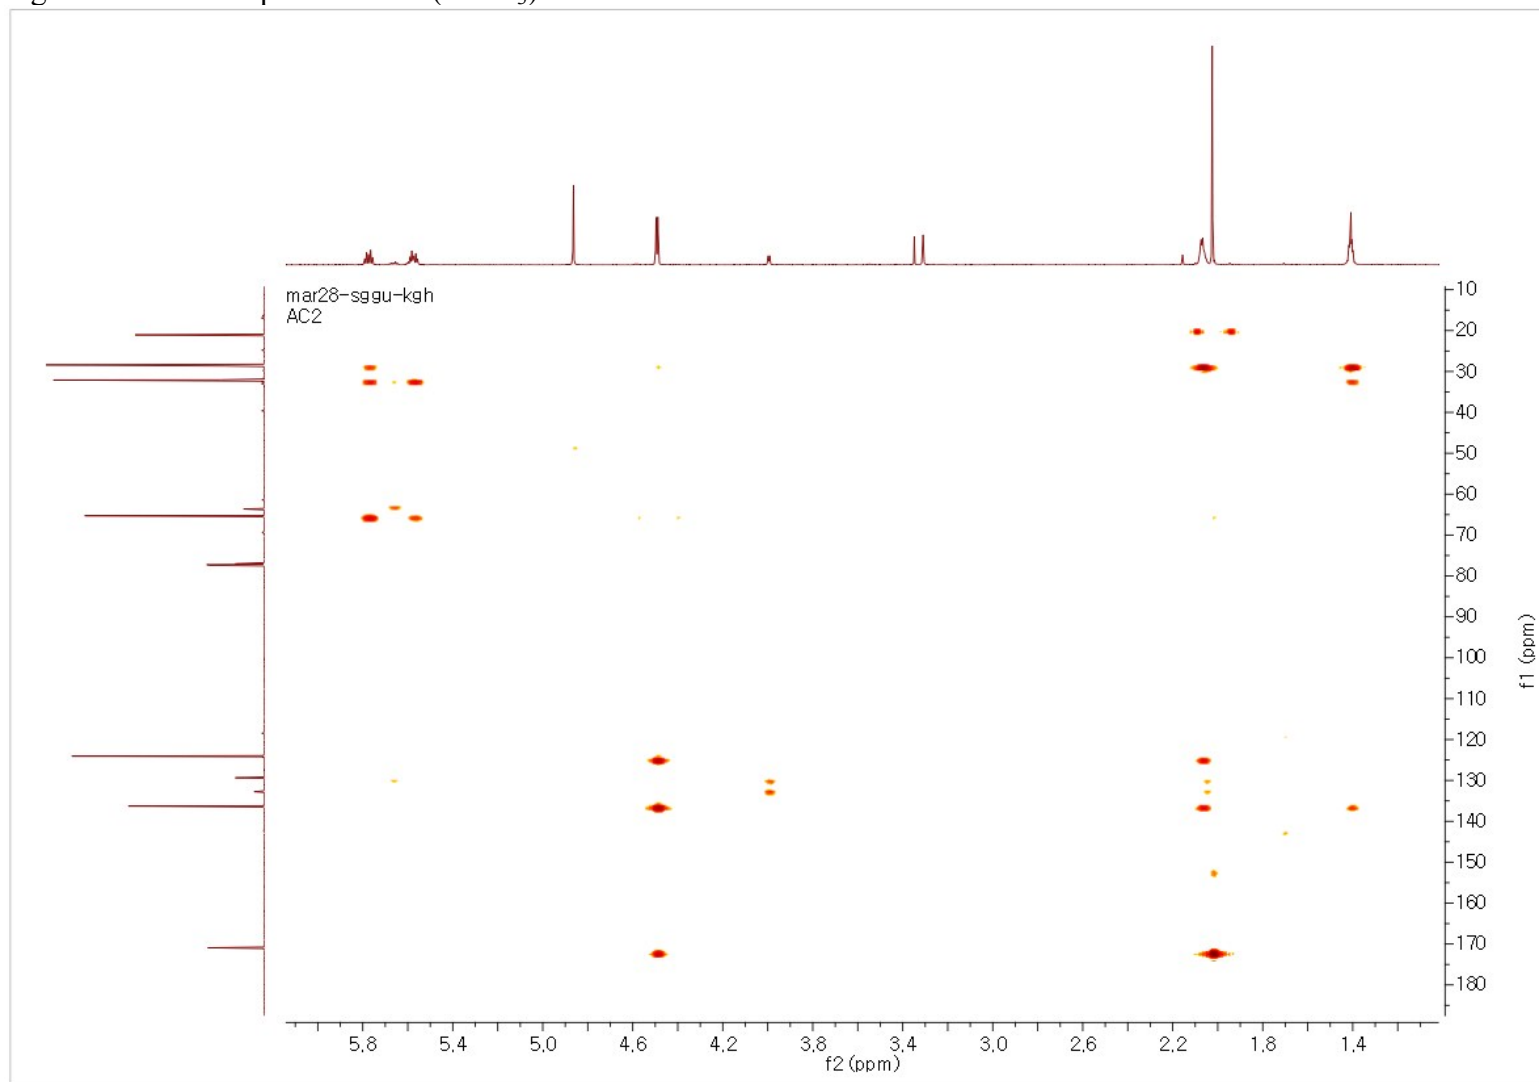

Figure S7. HR-ESIMS data of **2**

**Single Mass Analysis**

Tolerance = 10.0 PPM / DBE: min = -1.5, max = 50.0

Element prediction: Off

Number of isotope peaks used for i-FIT = 3

Monoisotopic Mass, Even Electron Ions

70 formula(e) evaluated with 1 results within limits (up to 50 closest results for each mass)

Elements Used:

| Mass     | Calc. Mass | mDa | PPM | DBE | Formula                                           | i-FIT | i-FIT Norm | Fit Conf % | C  | H  | O | Na |
|----------|------------|-----|-----|-----|---------------------------------------------------|-------|------------|------------|----|----|---|----|
| 235.1310 | 235.1310   | 0.0 | 0.0 | 2.5 | C <sub>12</sub> H <sub>20</sub> O <sub>3</sub> Na | 35.9  | n/a        | n/a        | 12 | 20 | 3 | 1  |

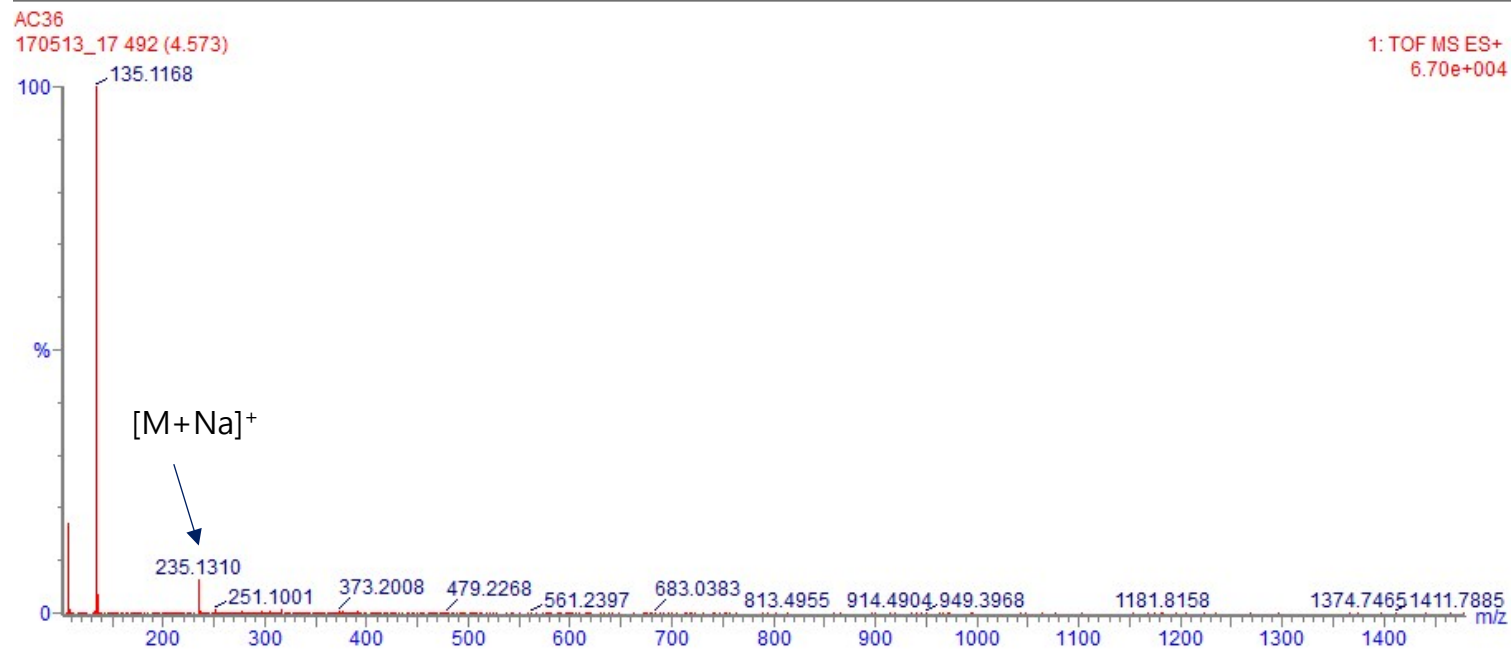

Figure S8.  $^1\text{H}$  NMR spectrum of **2** ( $\text{CDCl}_3$ , 700 MHz)

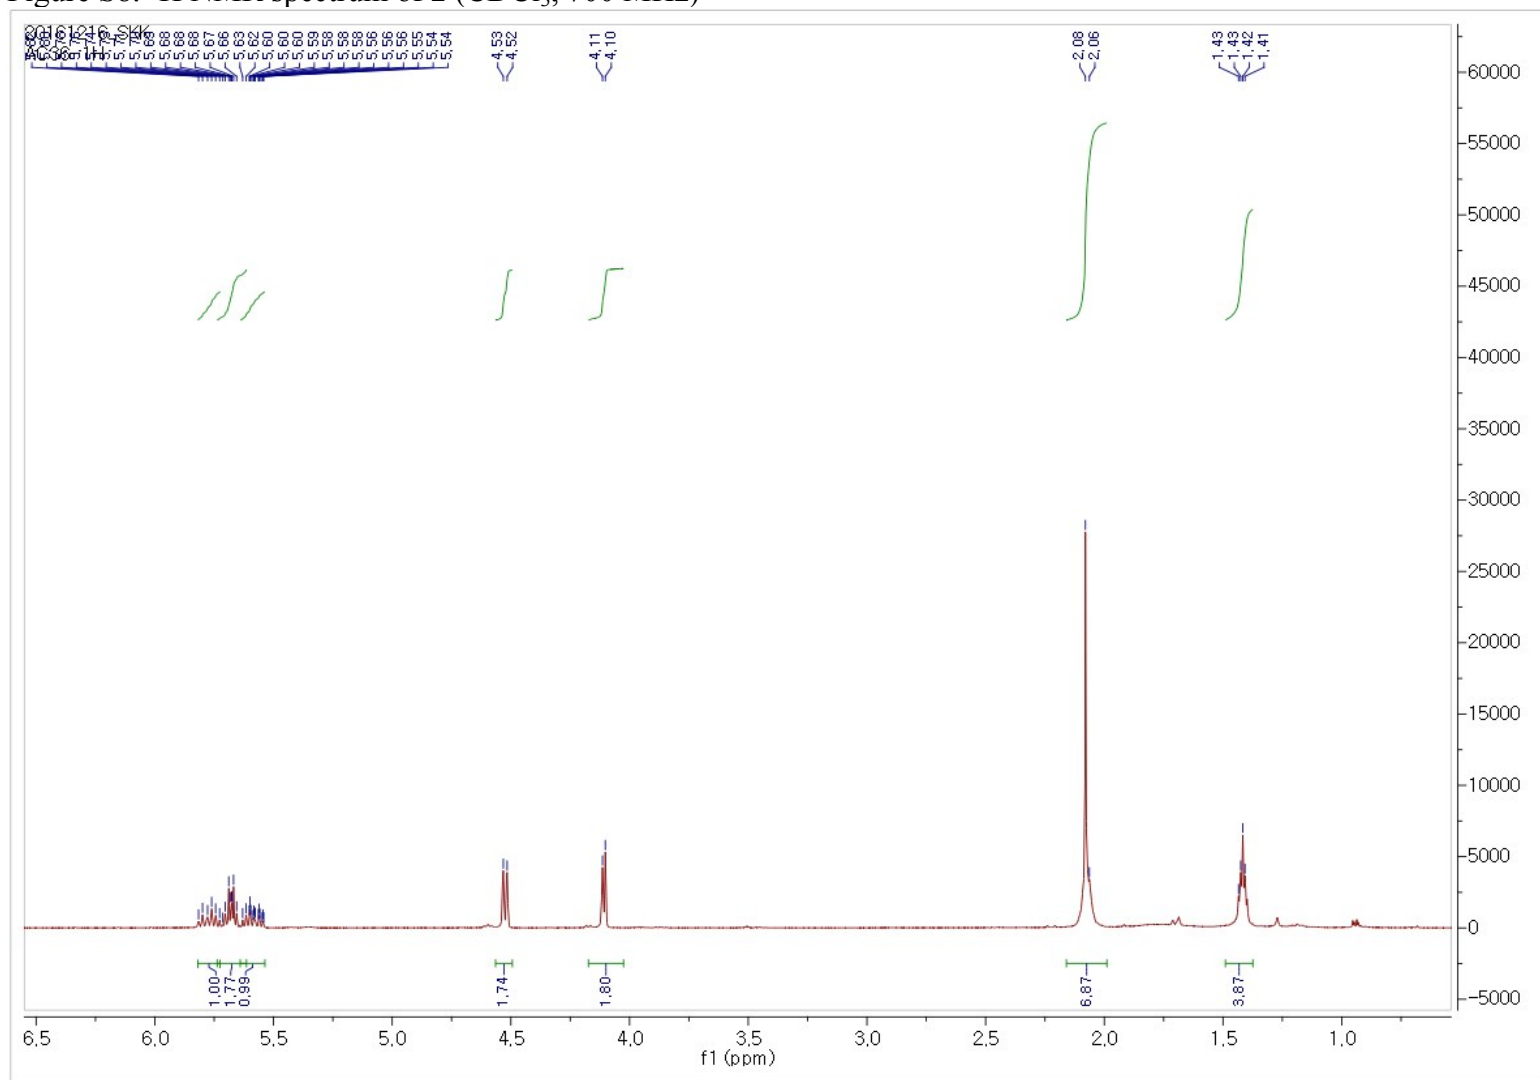

Figure S9.  $^{13}\text{C}$  NMR spectrum of **2** ( $\text{CDCl}_3$ , 175 MHz)

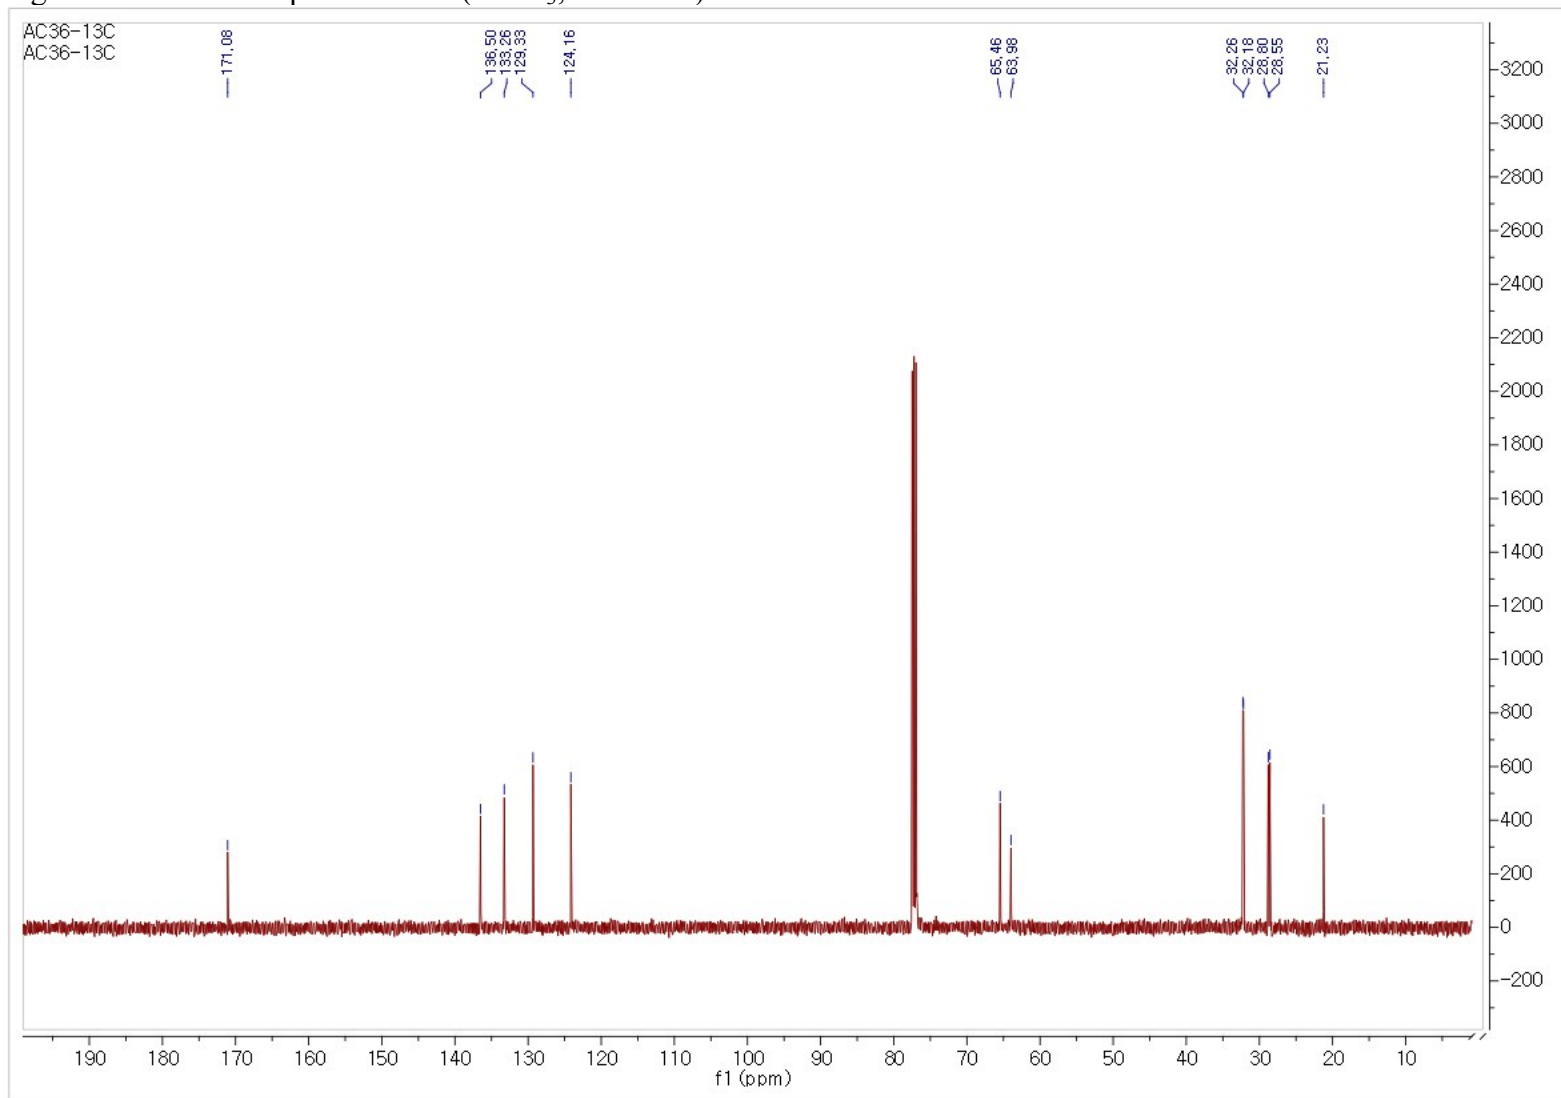

Figure S10. TOCSY spectrum of **2** (CDCl<sub>3</sub>)

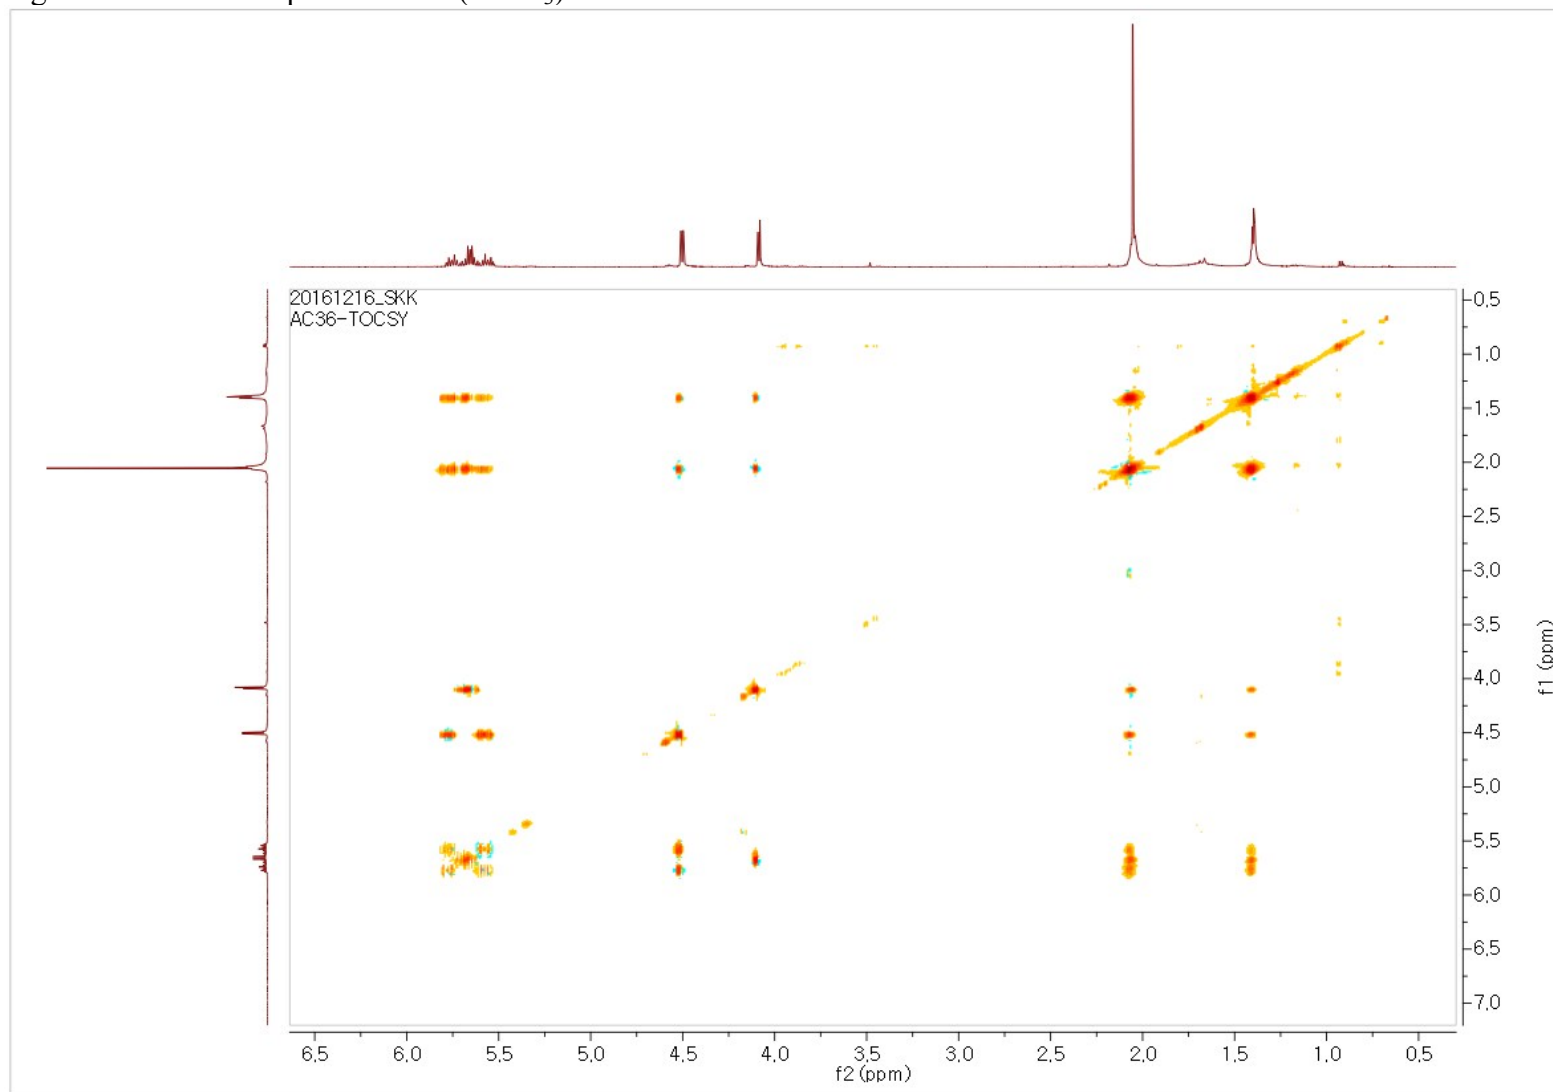

Figure S11. HSQC spectrum of **2** (CDCl<sub>3</sub>)

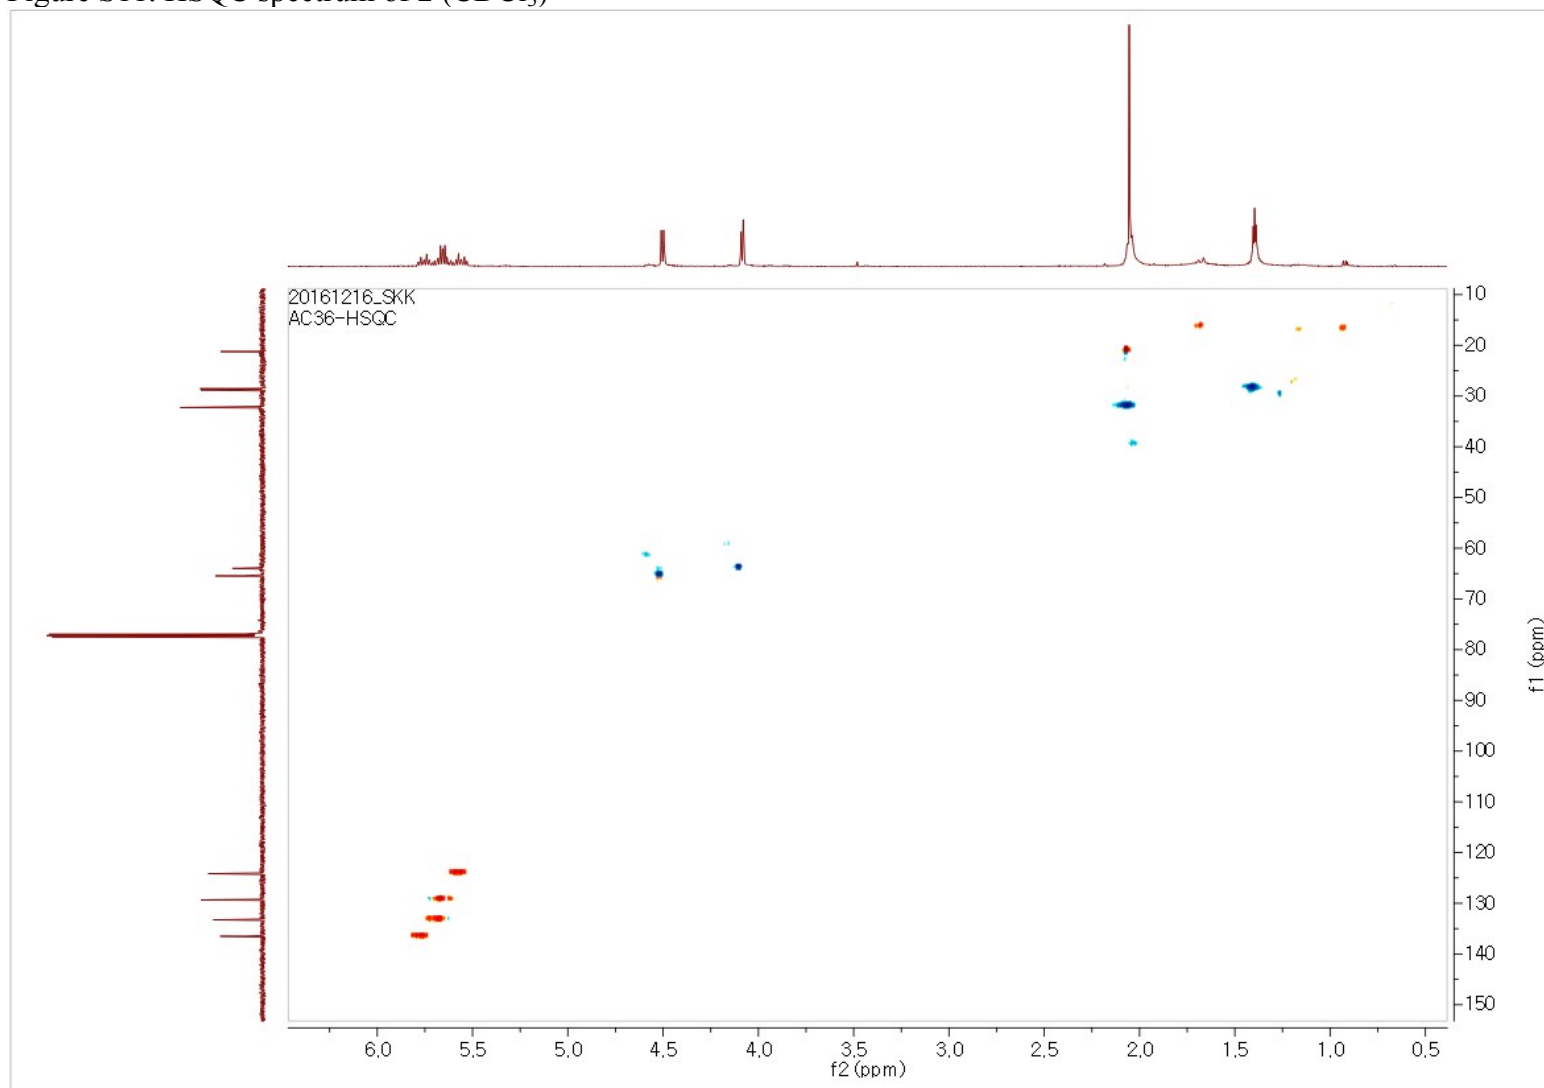

Figure S12. HMBC spectrum of **2** (CDCl<sub>3</sub>)

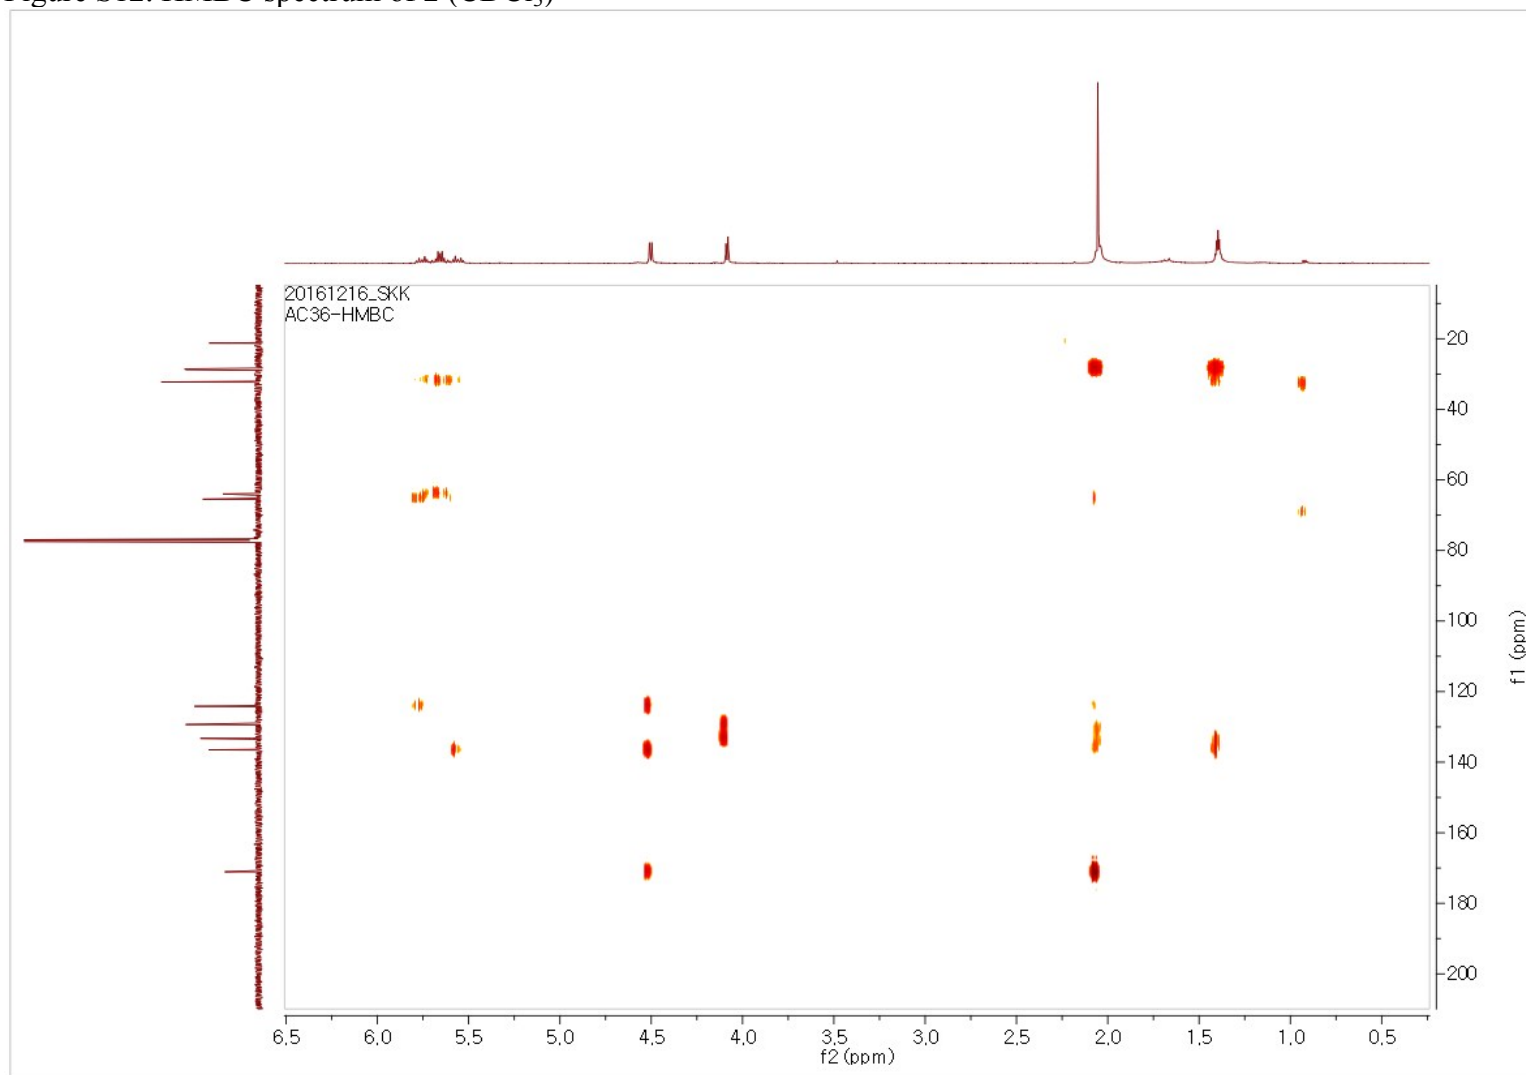

Figure S13. HR-ESIMS data of **5**

**Single Mass Analysis**

Tolerance = 10.0 PPM / DBE: min = -1.5, max = 50.0

Element prediction: Off

Number of isotope peaks used for i-FIT = 3

Monoisotopic Mass, Even Electron Ions

80 formula(e) evaluated with 2 results within limits (up to 50 closest results for each mass)

Elements Used:

| Mass     | Calc. Mass | mDa  | PPM  | DBE | Formula       | i-FIT | i-FIT Norm | Fit Conf % | C  | H  | O | Na |
|----------|------------|------|------|-----|---------------|-------|------------|------------|----|----|---|----|
| 265.1795 | 265.1804   | -0.9 | -3.4 | 4.5 | C16 H25 O3    | 354.4 | 0.022      | 97.81      | 16 | 25 | 3 |    |
|          | 265.1780   | 1.5  | 5.7  | 1.5 | C14 H26 O3 Na | 358.2 | 3.823      | 2.19       | 14 | 26 | 3 | 1  |

AC16

170513\_2 604 (5.608)

1: TOF MS ES-  
2.59e+005

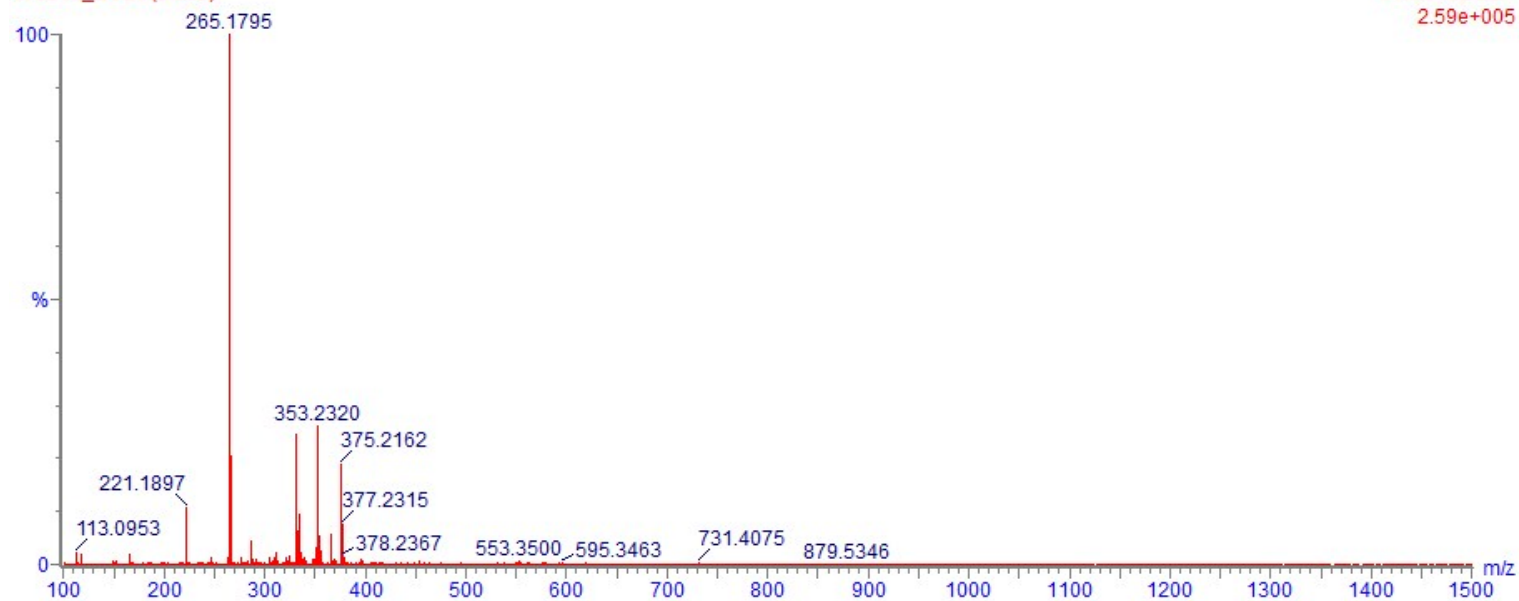



Figure S14.  $^1\text{H}$  NMR spectrum of **5** ( $\text{CDCl}_3$ , 600 MHz)

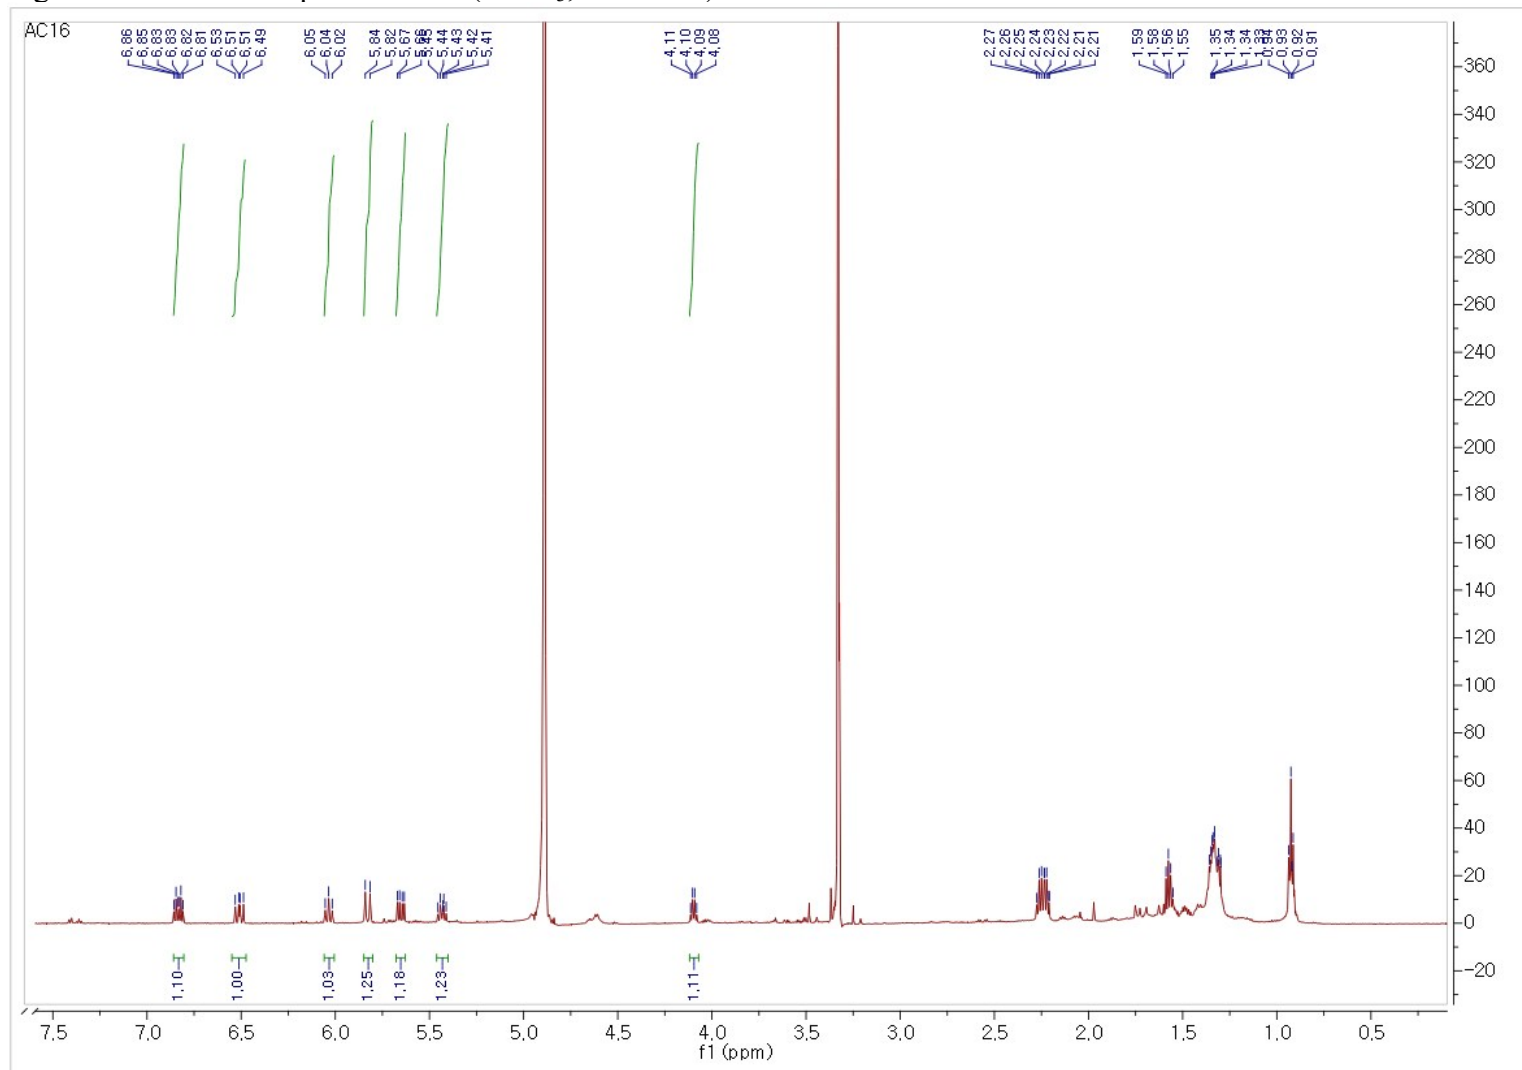

Figure S15.  $^{13}\text{C}$  NMR spectrum of **5** ( $\text{CDCl}_3$ , 150 MHz)

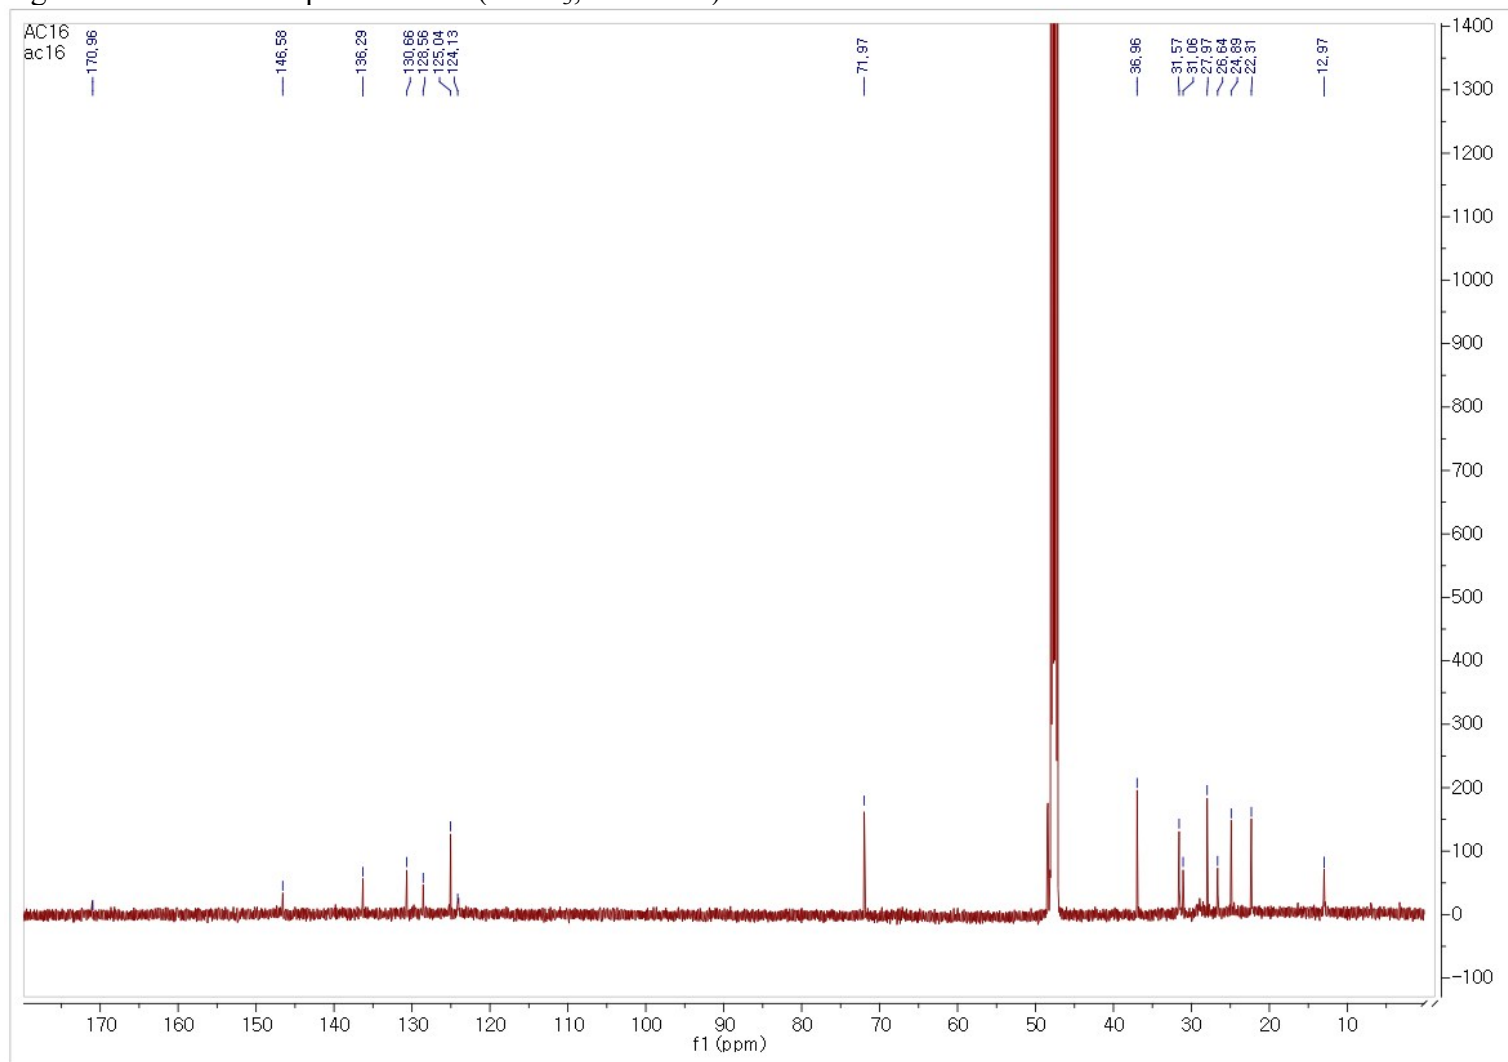

Figure S16.  $^1\text{H}$ - $^1\text{H}$  COSY spectrum of **5** ( $\text{CDCl}_3$ )

20170308 AC16-HMBC\_COSY.013.esp

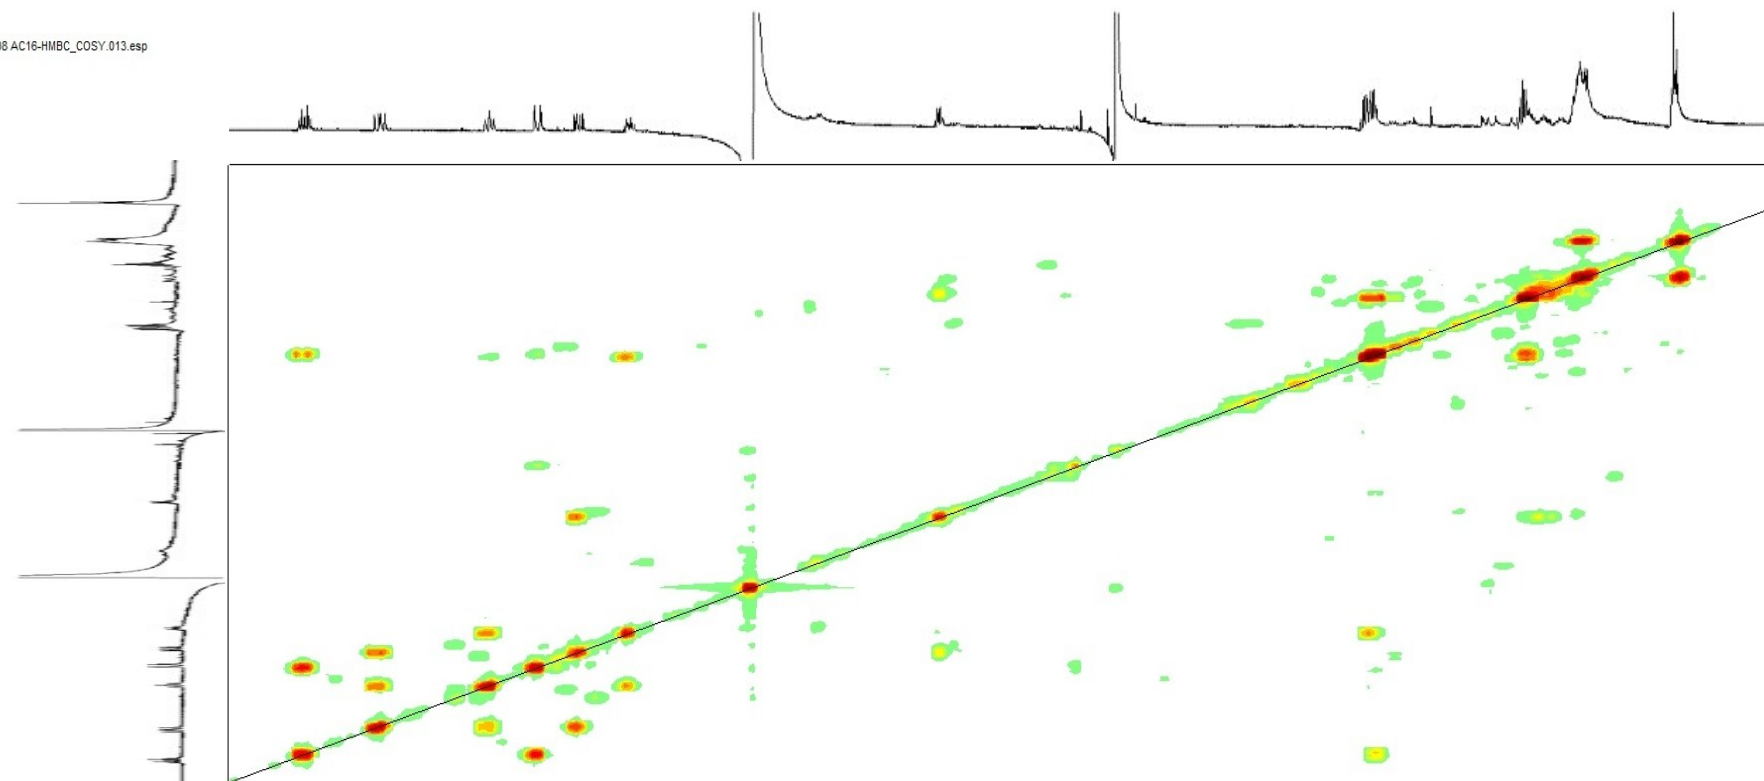

Figure S17. HSQC spectrum of **5** (CDCl<sub>3</sub>)

2D NMR ac16-hsqc (1).011.esp

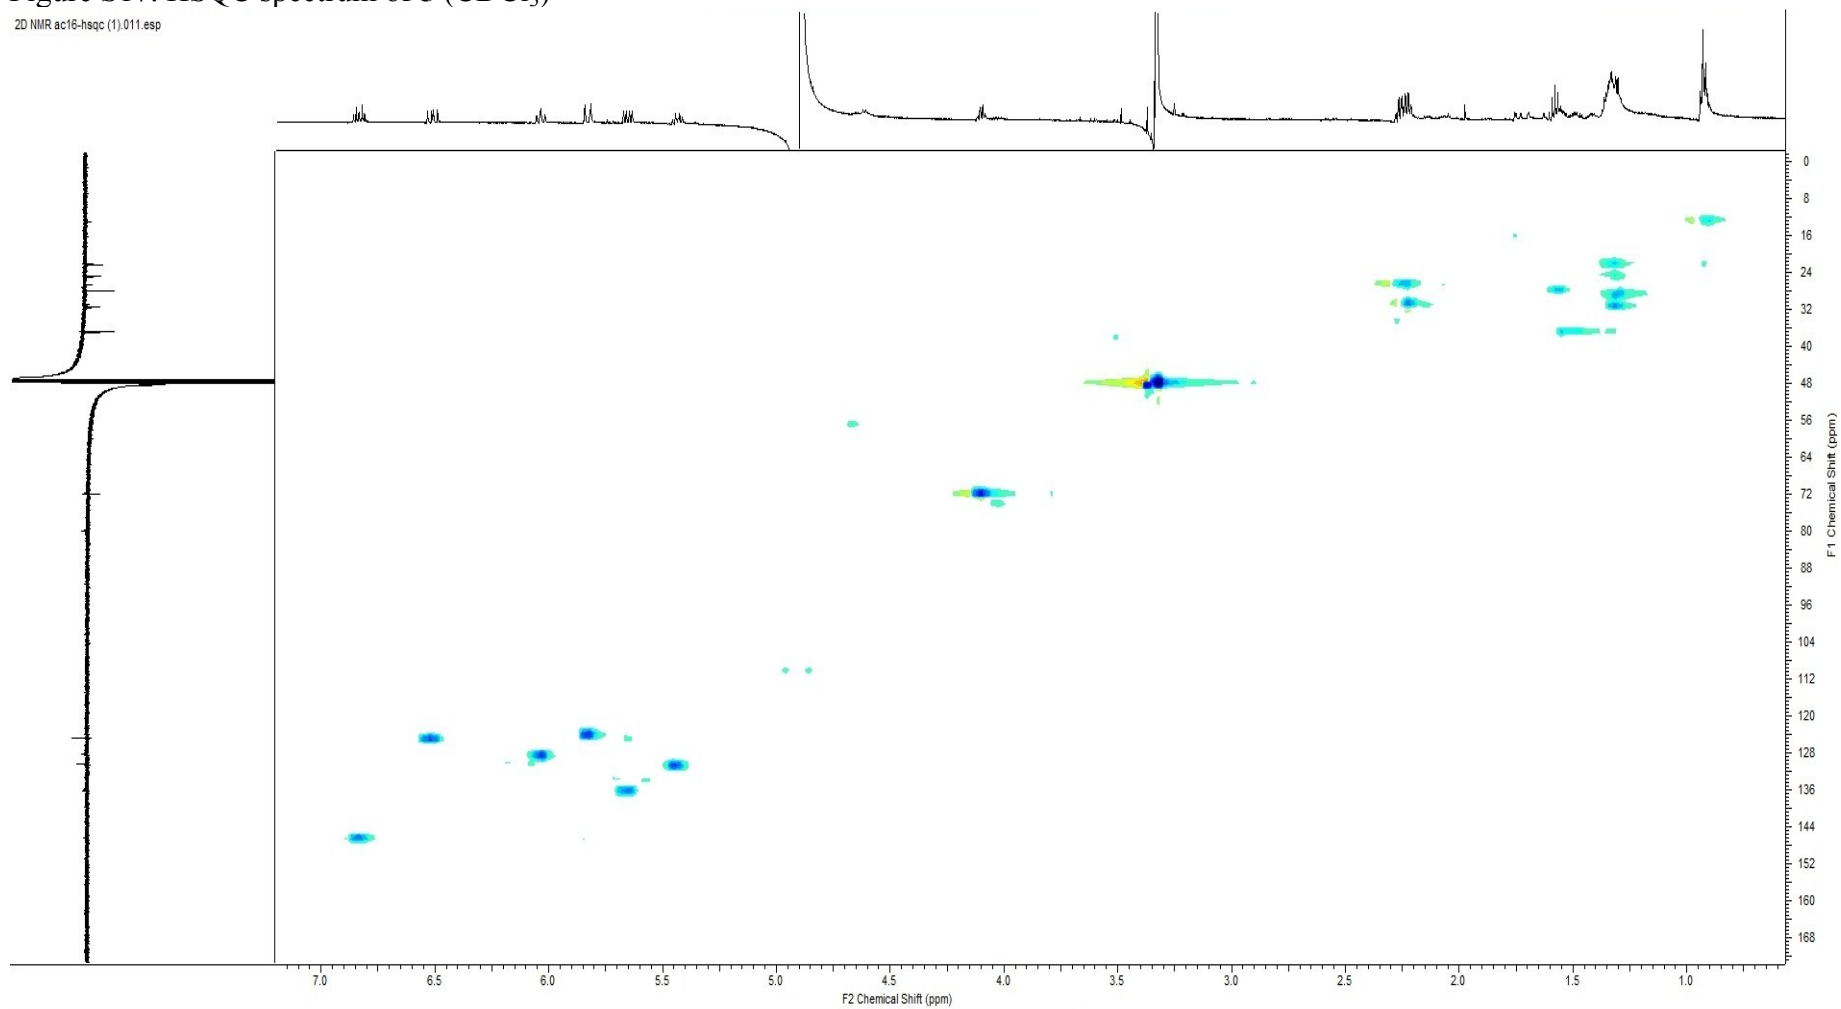

Figure S18. HMBC spectrum of **5** (CDCl<sub>3</sub>)

20170308 AC16-HMBC\_COSY.012.esp

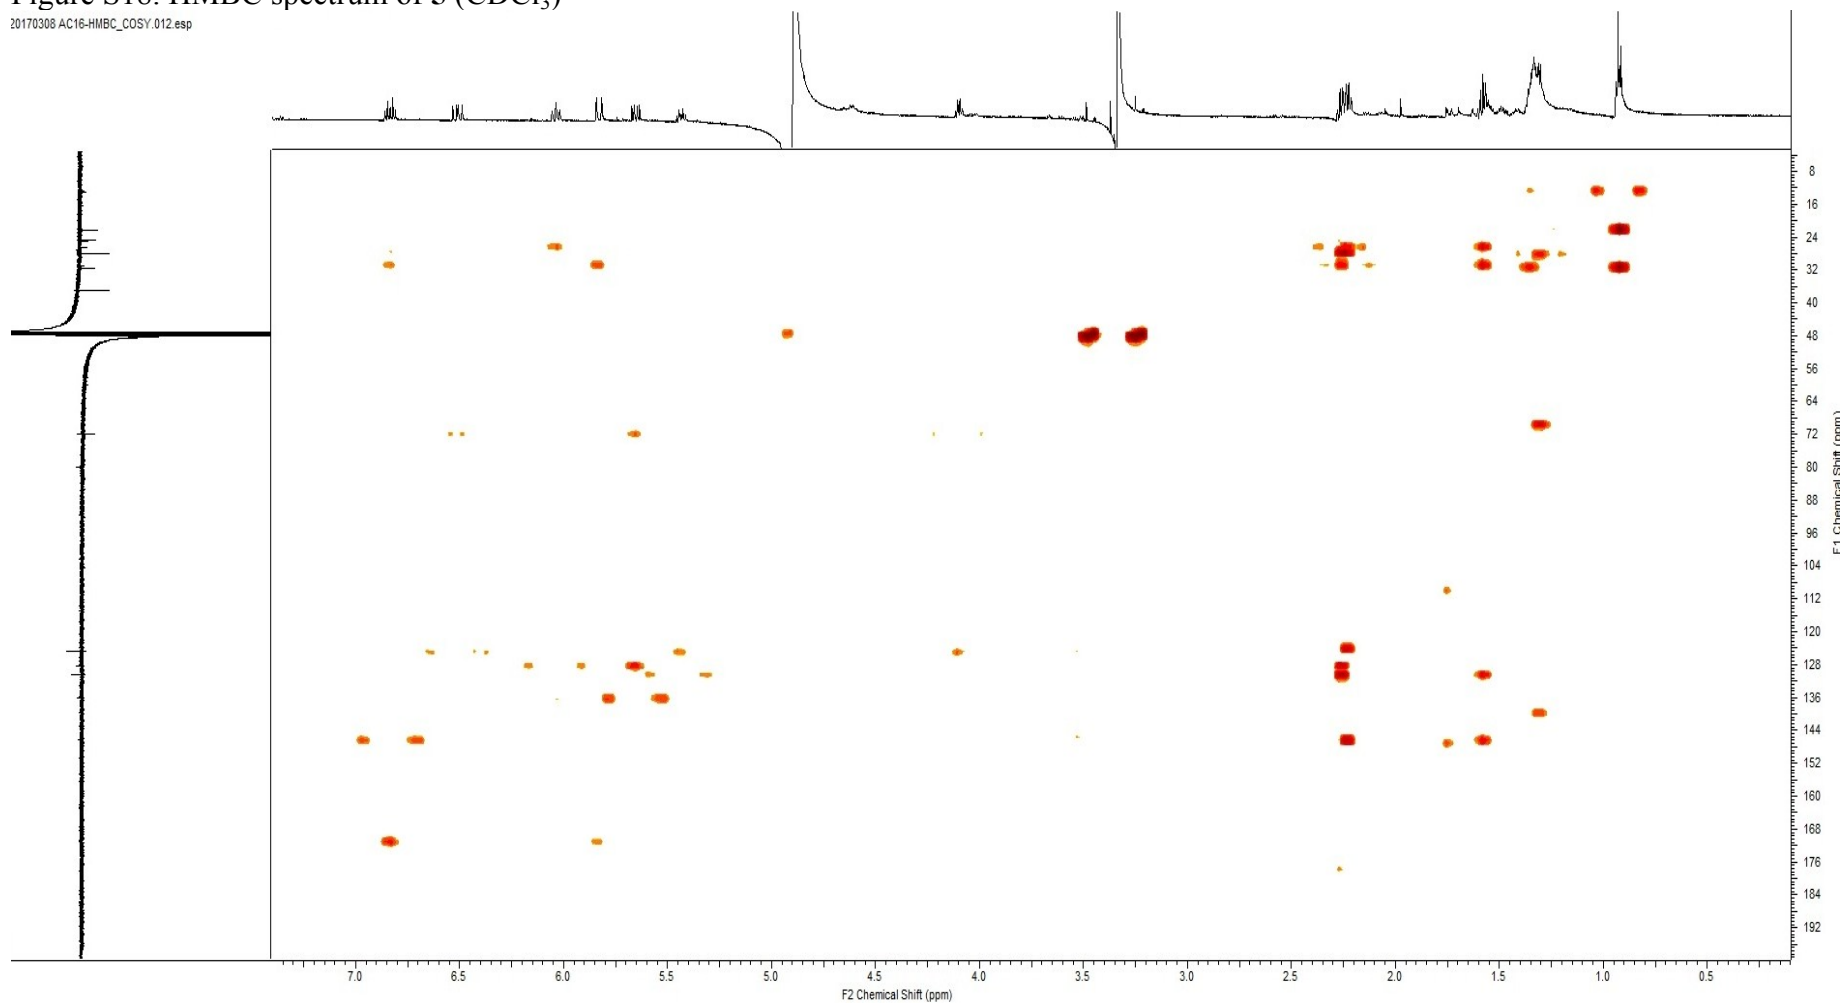

Figure S19. MS/MS analysis of **5** (MS<sup>2</sup> 265 → full-scan)

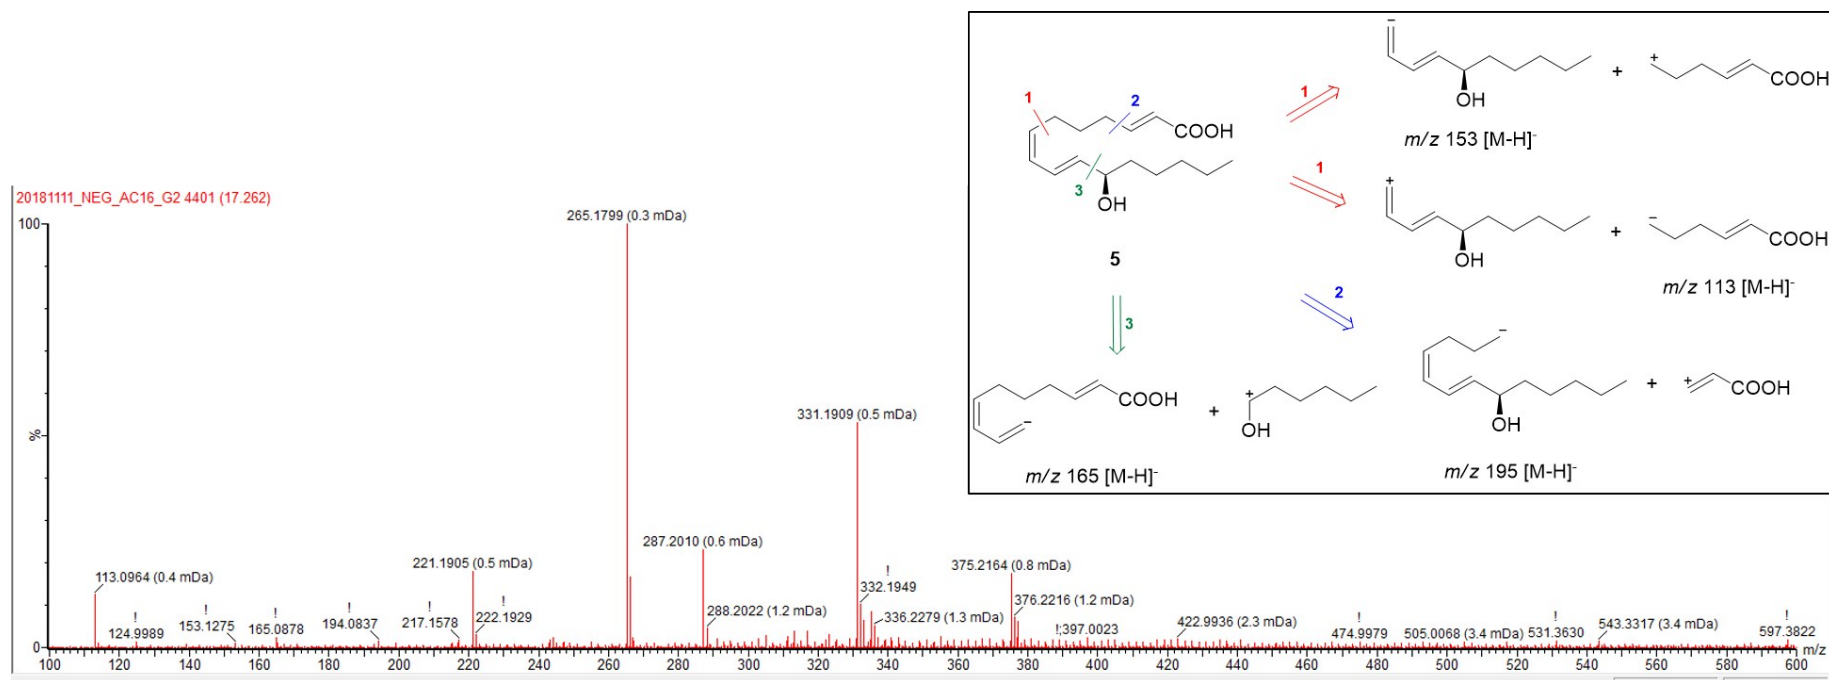

Figure S20. LC/MS data of acylated derivative from CEA reaction of **5**: (a) An acylated derivative of compound **5** in *R*-HBTM catalyzed acylation reaction at 10 min; (b) An acylated derivative of compound **5** in *S*-HBTM catalyzed acylation reaction at 10 min

a) An acylated derivative of compound **5** in *R*-HBTM catalyzed acylation reaction at 10 min

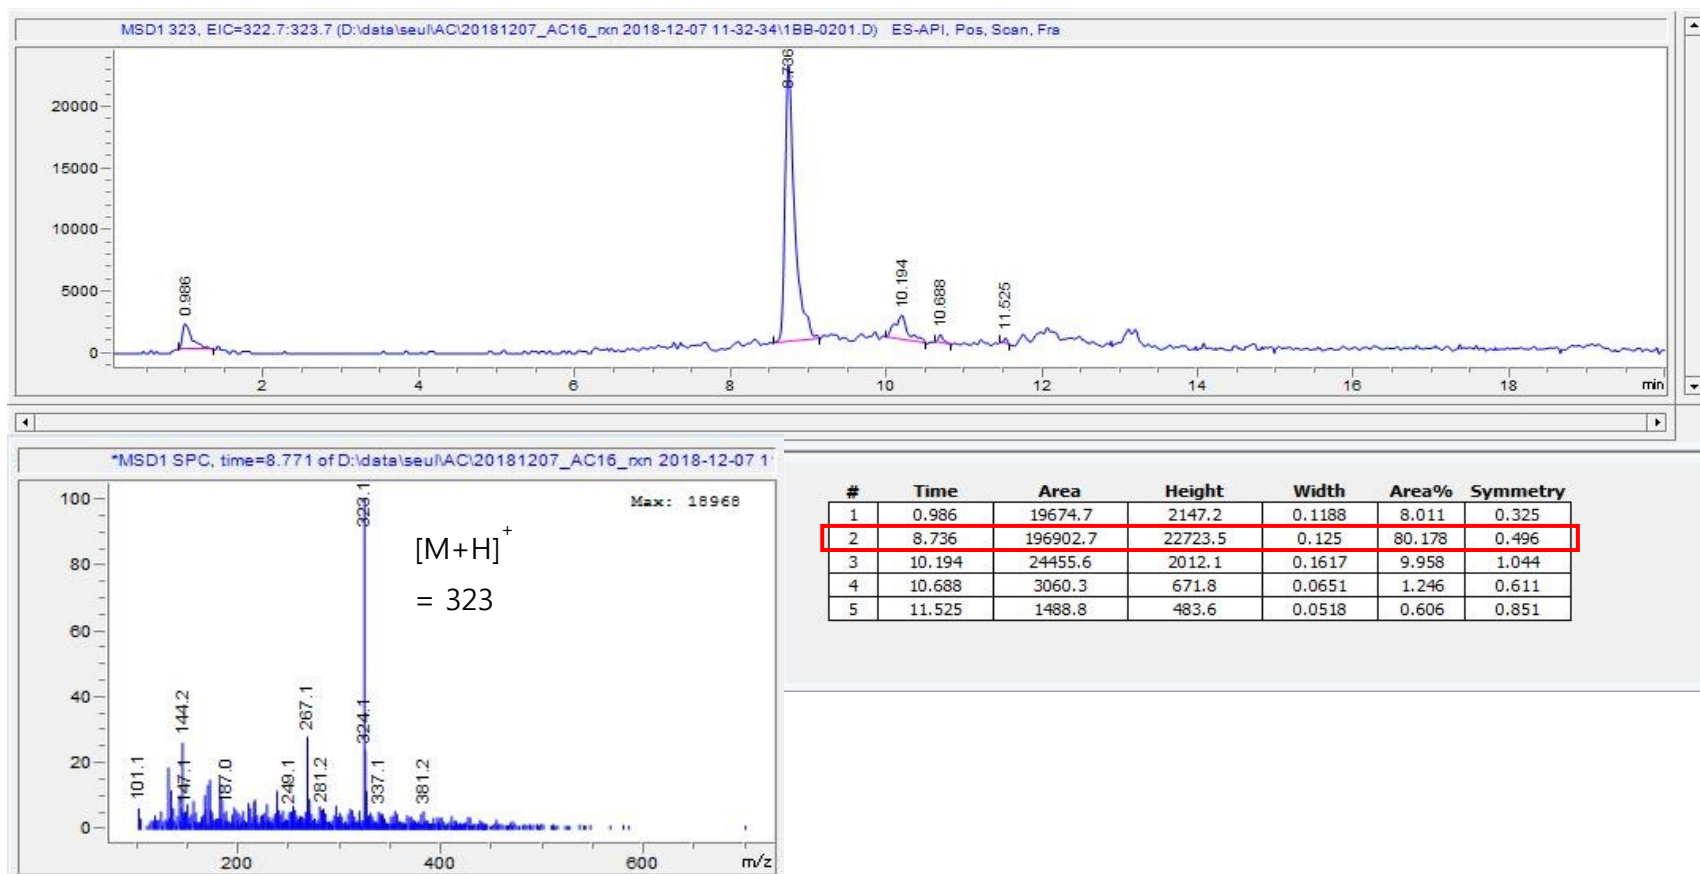

b) An acylated derivative of compound **5** in *S*-HBTM catalyzed acylation reaction at 10 min

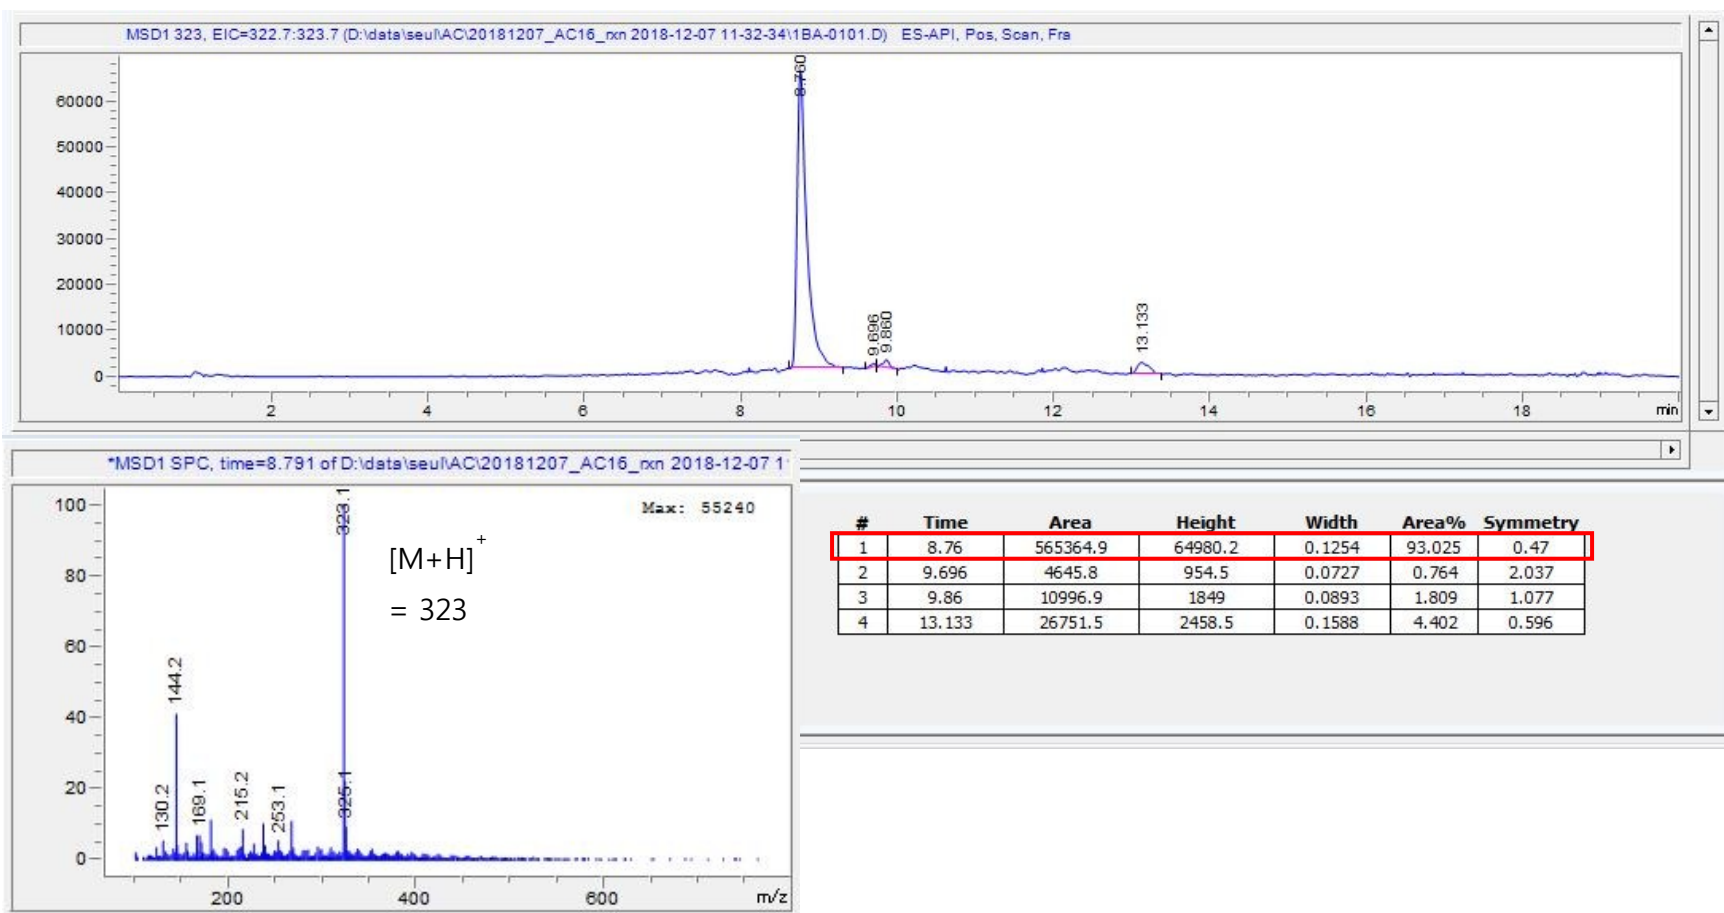



Figure S21. HR-ESIMS data of **10**

**Single Mass Analysis**  
Tolerance = 10.0 PPM / DBE: min = -1.5, max = 50.0  
Element prediction: Off  
Number of isotope peaks used for i-FIT = 3  
Monoisotopic Mass, Even Electron Ions  
58 formula(e) evaluated with 2 results within limits (up to 50 closest results for each mass)  
Elements Used:

| Mass     | Calc. Mass | mDa  | PPM  | DBE | Formula      | i-FIT | i-FIT Norm | Fit Conf % | C  | H  | O | Na |
|----------|------------|------|------|-----|--------------|-------|------------|------------|----|----|---|----|
| 211.0962 | 211.0970   | -0.8 | -3.8 | 4.5 | C11 H15 O4   | 100.2 | 0.710      | 49.15      | 11 | 15 | 4 |    |
|          | 211.0946   | 1.6  | 7.6  | 1.5 | C9 H16 O4 Na | 100.2 | 0.676      | 50.85      | 9  | 16 | 4 | 1  |

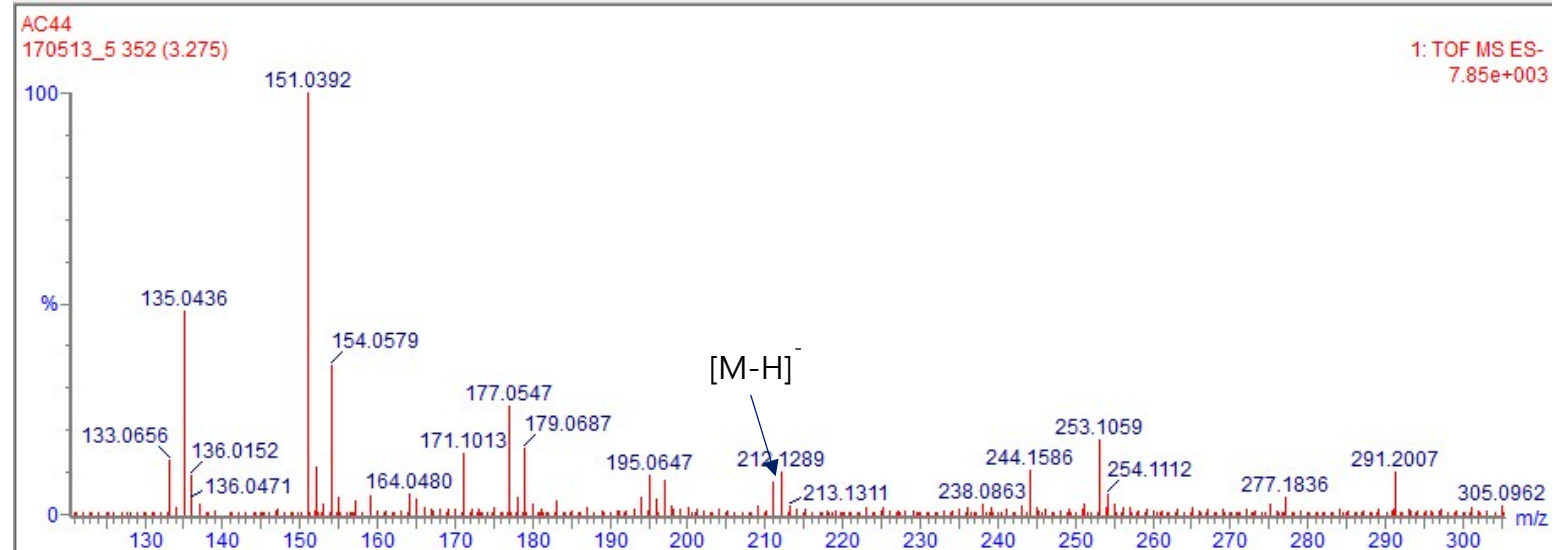

Figure S22.  $^1\text{H}$  NMR spectrum of **10** ( $\text{CD}_3\text{OD}$ , 850 MHz)

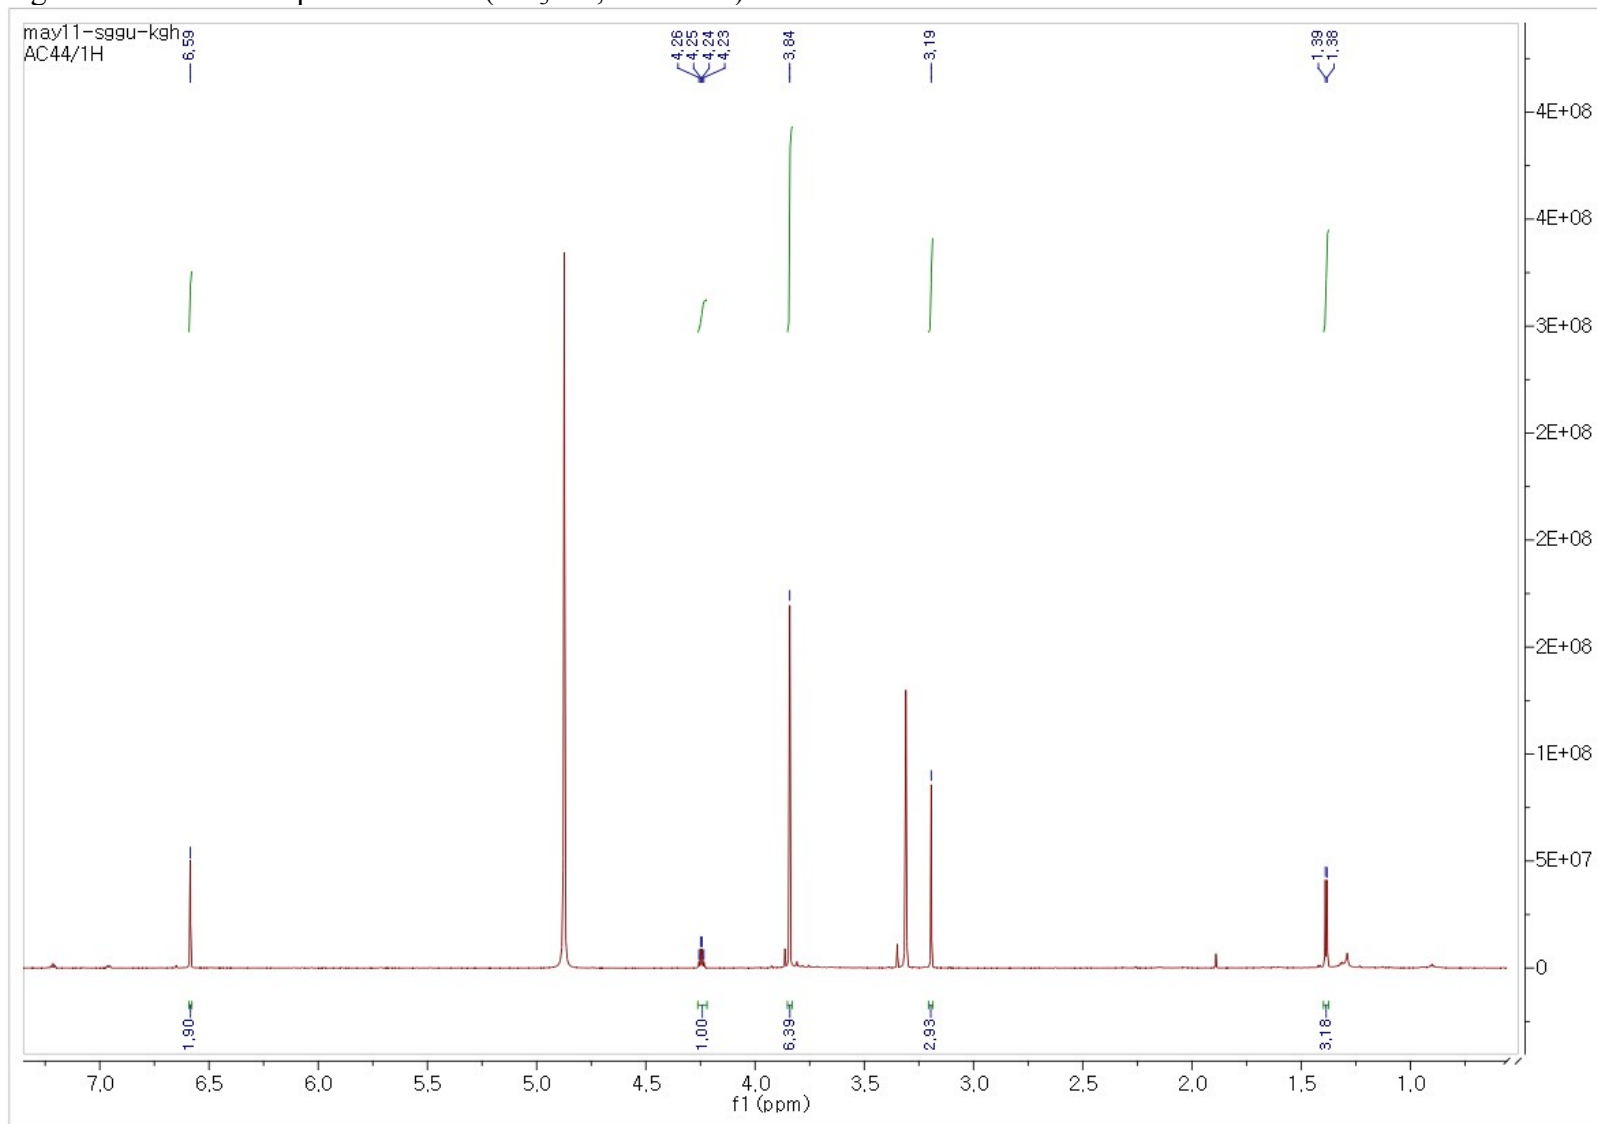

Figure S23.  $^1\text{H}$ - $^1\text{H}$  COSY spectrum of **10** ( $\text{CD}_3\text{OD}$ )

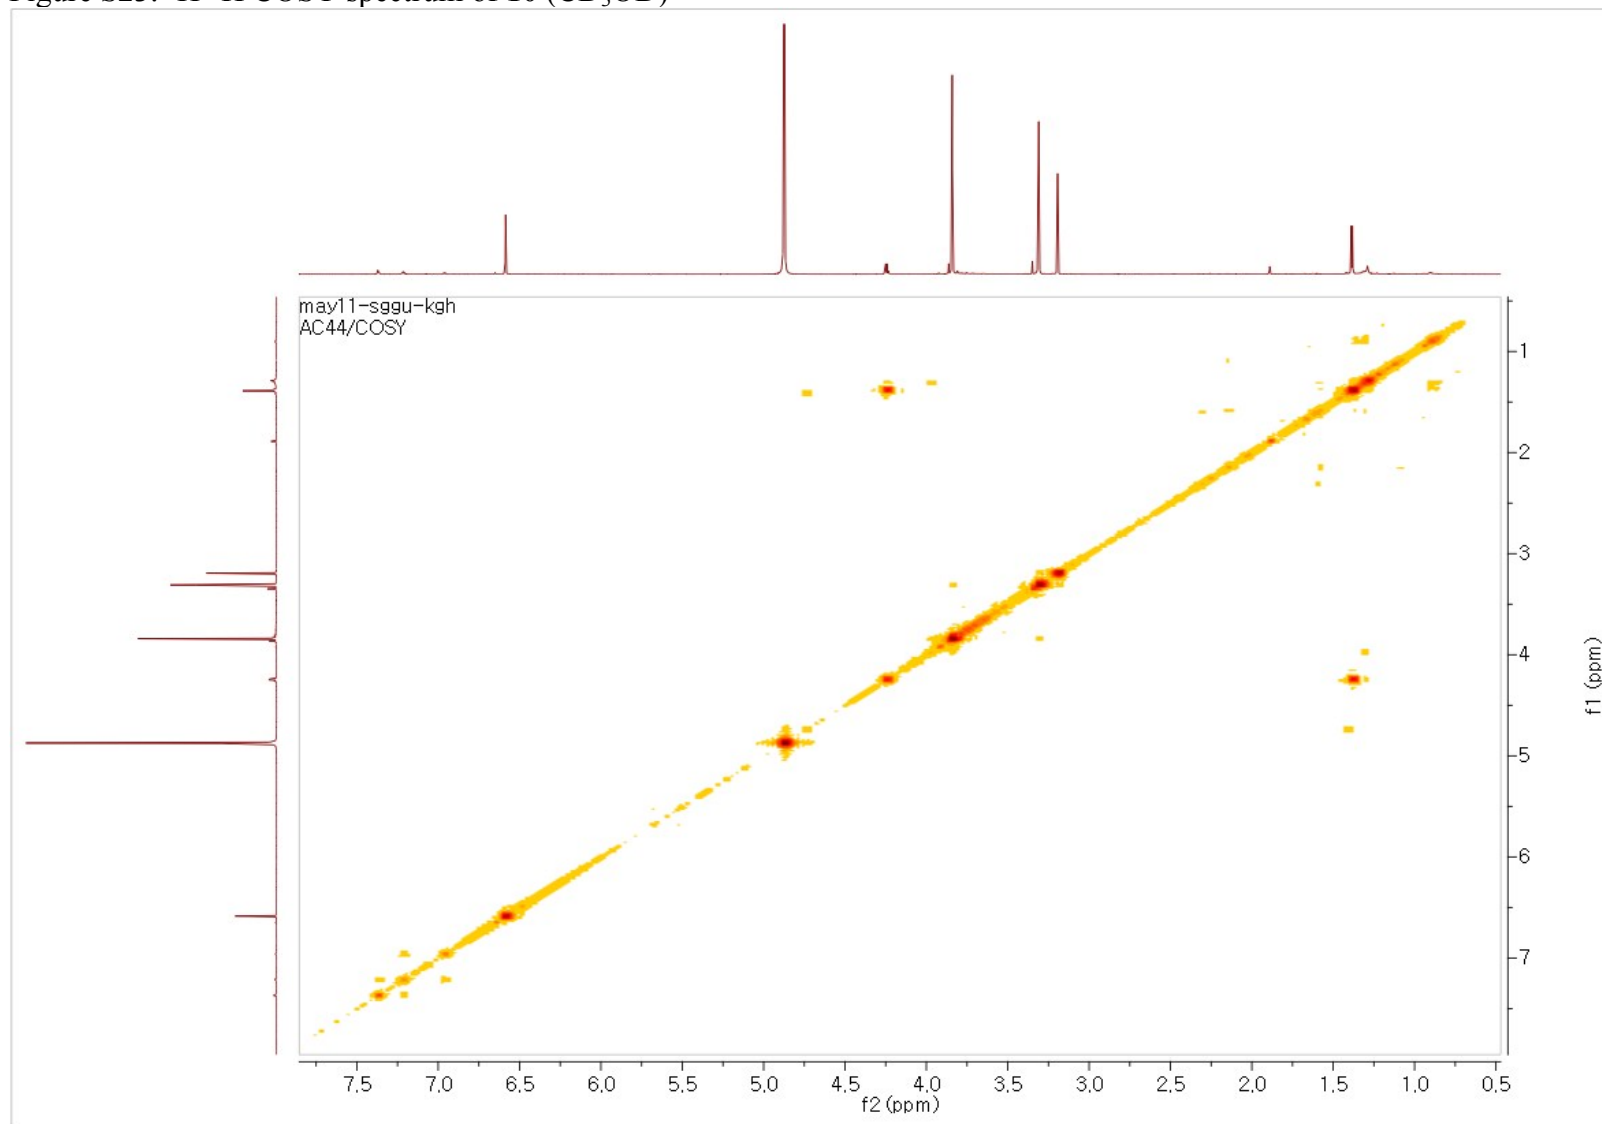

Figure S24. HSQC spectrum of **10** (CD<sub>3</sub>OD)

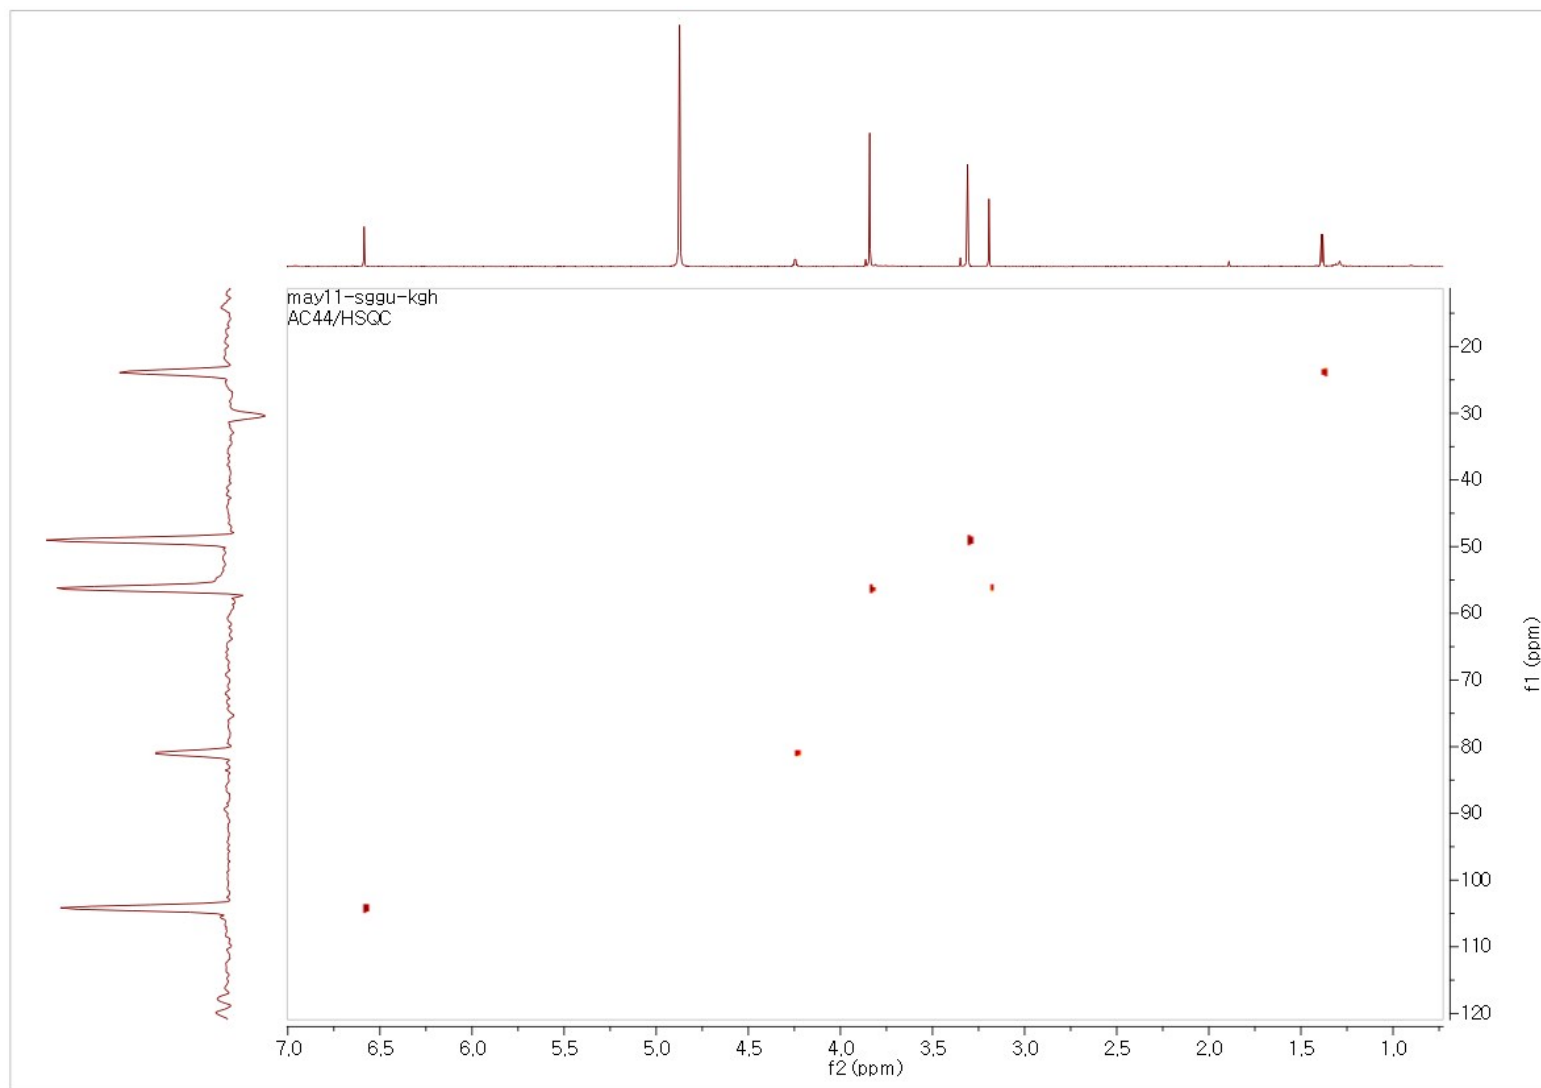

Figure S25. HMBC spectrum of **10** (CD<sub>3</sub>OD)

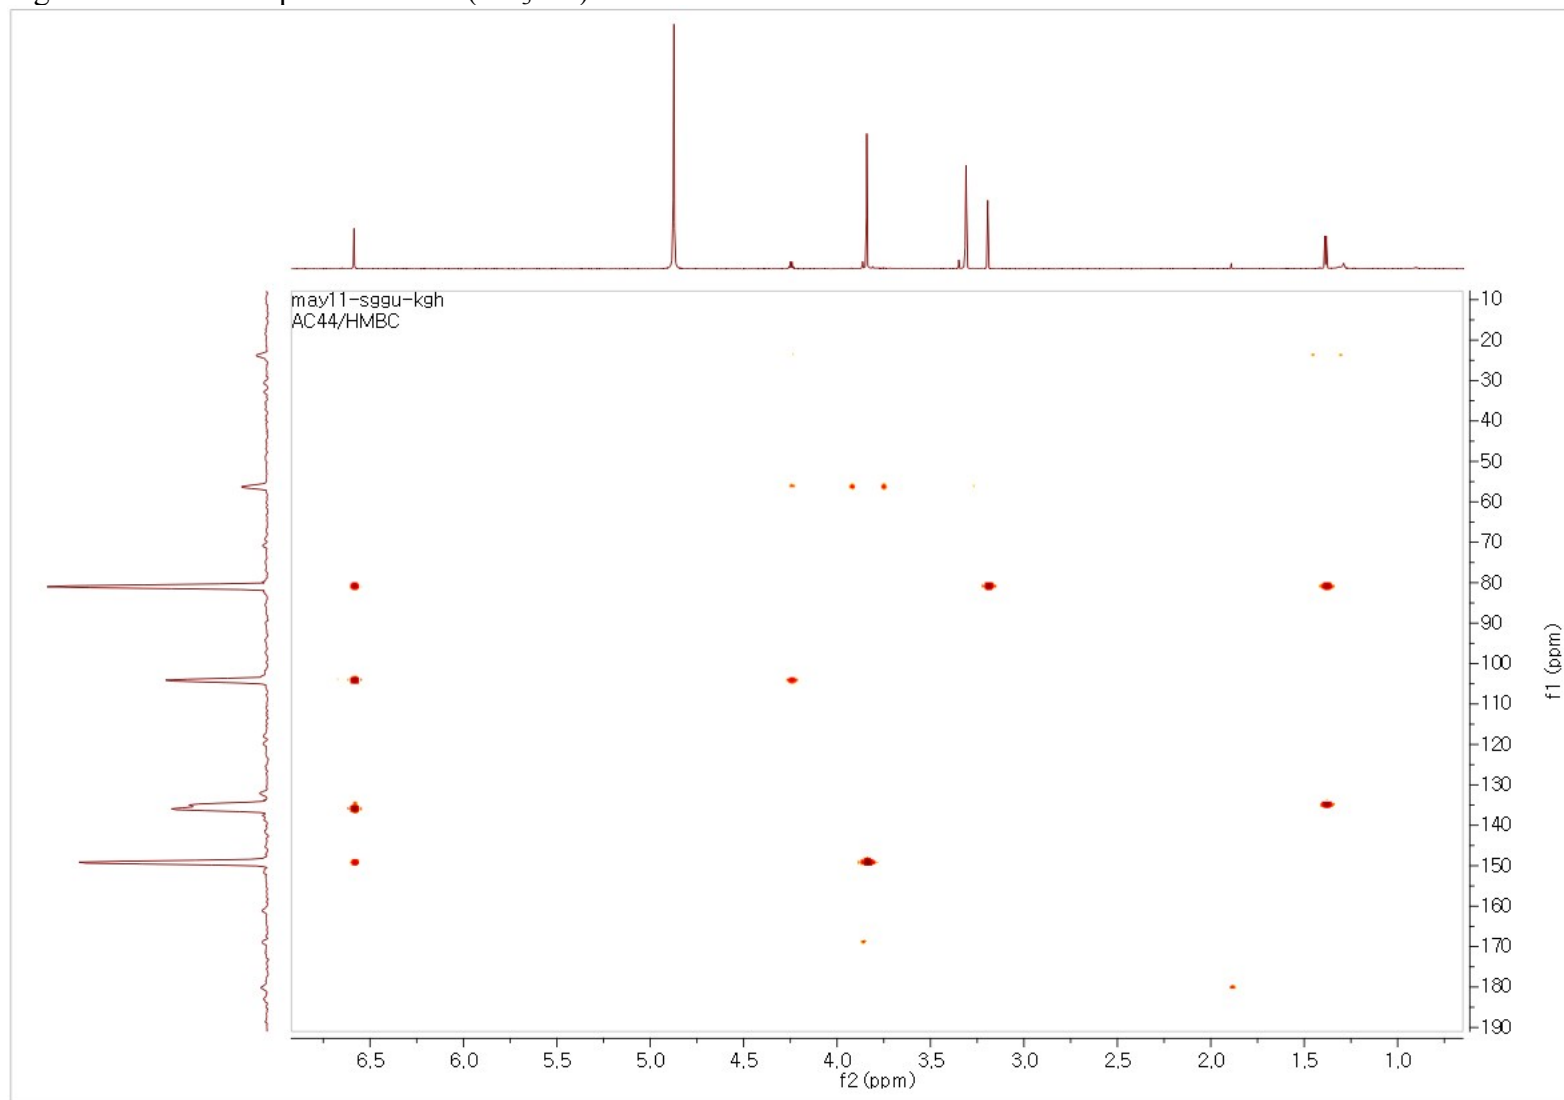

Figure S26. HR-ESIMS data of **11**

**Single Mass Analysis**

Tolerance = 10.0 PPM / DBE: min = -1.5, max = 50.0

Element prediction: Off

Number of isotope peaks used for i-FIT = 3

Monoisotopic Mass, Even Electron Ions

72 formula(e) evaluated with 2 results within limits (up to 50 closest results for each mass)

Elements Used:

| Mass     | Calc. Mass | mDa  | PPM   | DBE | Formula       | i-FIT | i-FIT Norm | Fit Conf % | C  | H  | O | Na |
|----------|------------|------|-------|-----|---------------|-------|------------|------------|----|----|---|----|
| 249.1102 | 249.1103   | -0.1 | -0.4  | 3.5 | C12 H18 O4 Na | 64.2  | 0.496      | 60.91      | 12 | 18 | 4 | 1  |
|          | 249.1127   | -2.5 | -10.0 | 6.5 | C14 H17 O4    | 64.6  | 0.939      | 39.09      | 14 | 17 | 4 |    |

AC28

170513\_16 430 (3.994)

1: TOF MS ES+  
7.24e+004

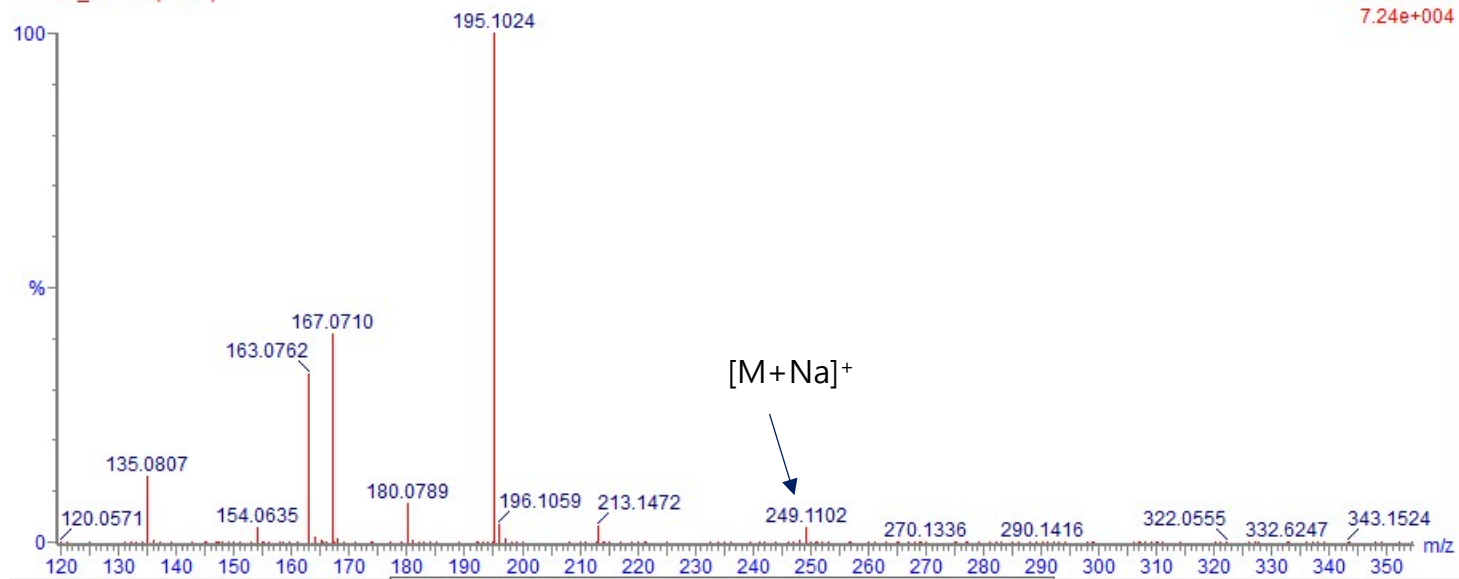

Figure S27.  $^1\text{H}$  NMR spectrum of **11** ( $\text{CD}_3\text{OD}$ , 800 MHz)

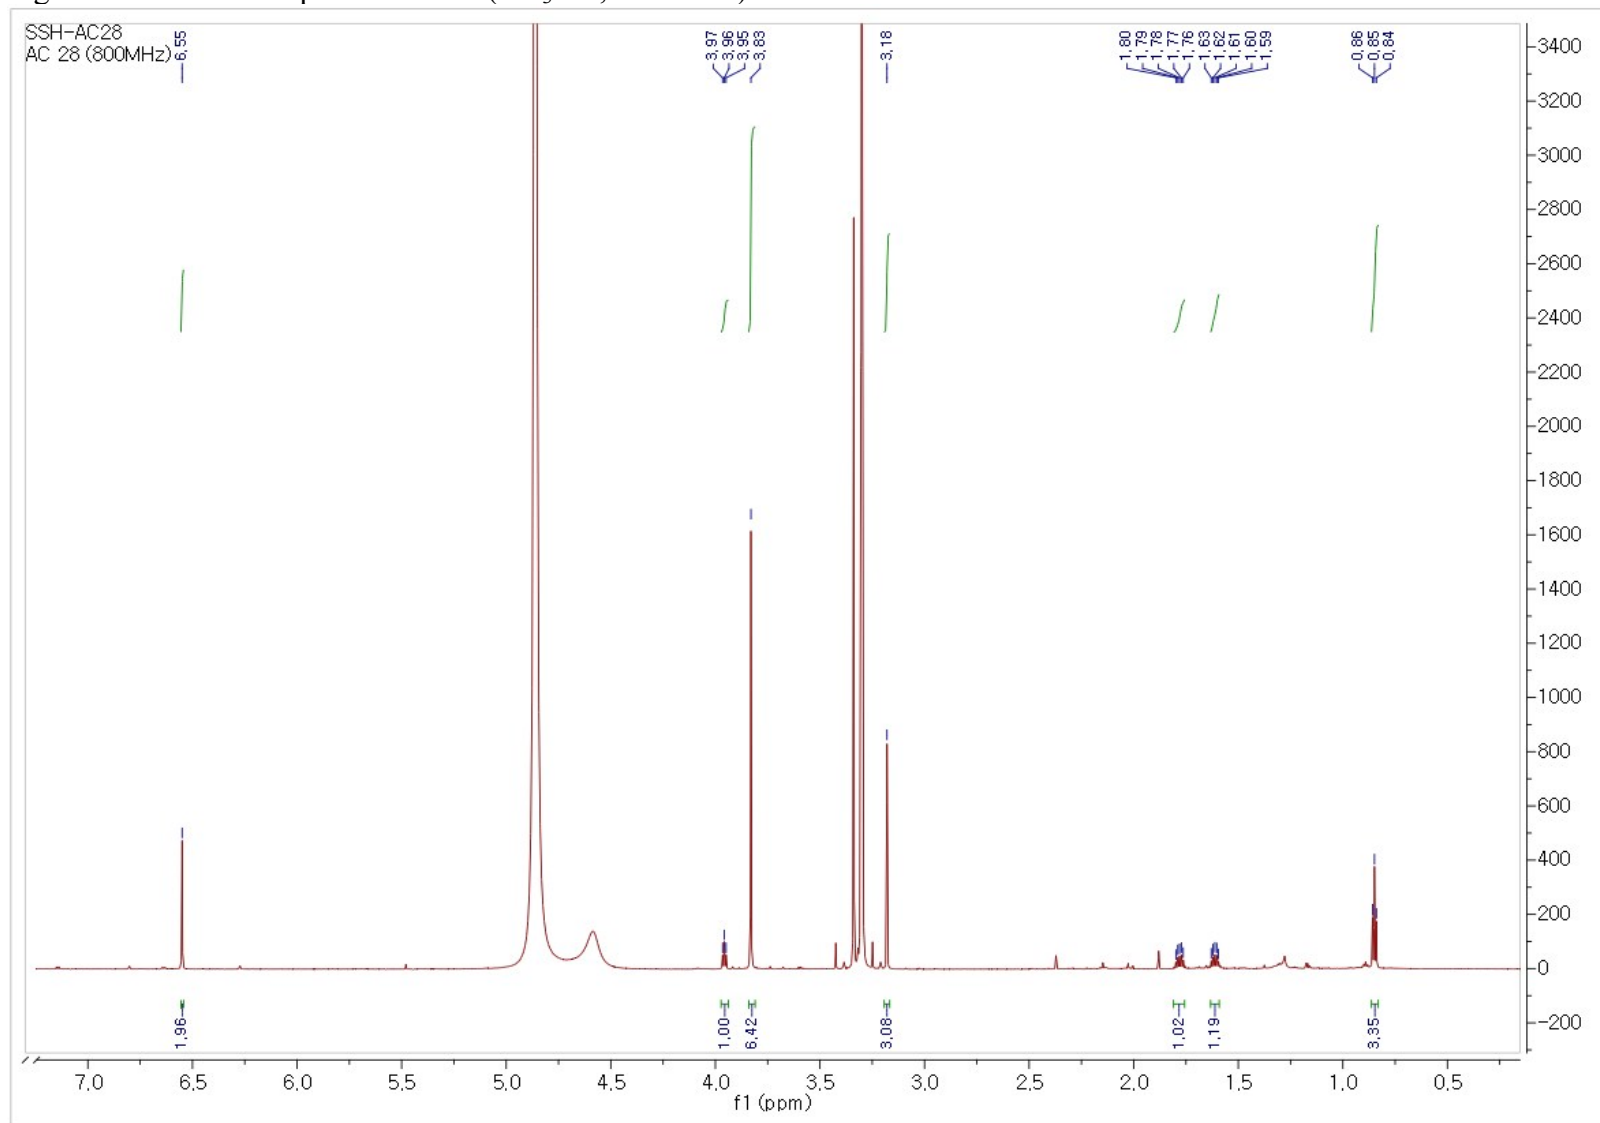

Figure S28.  $^1\text{H}$ - $^1\text{H}$  COSY spectrum of **11** ( $\text{CD}_3\text{OD}$ )

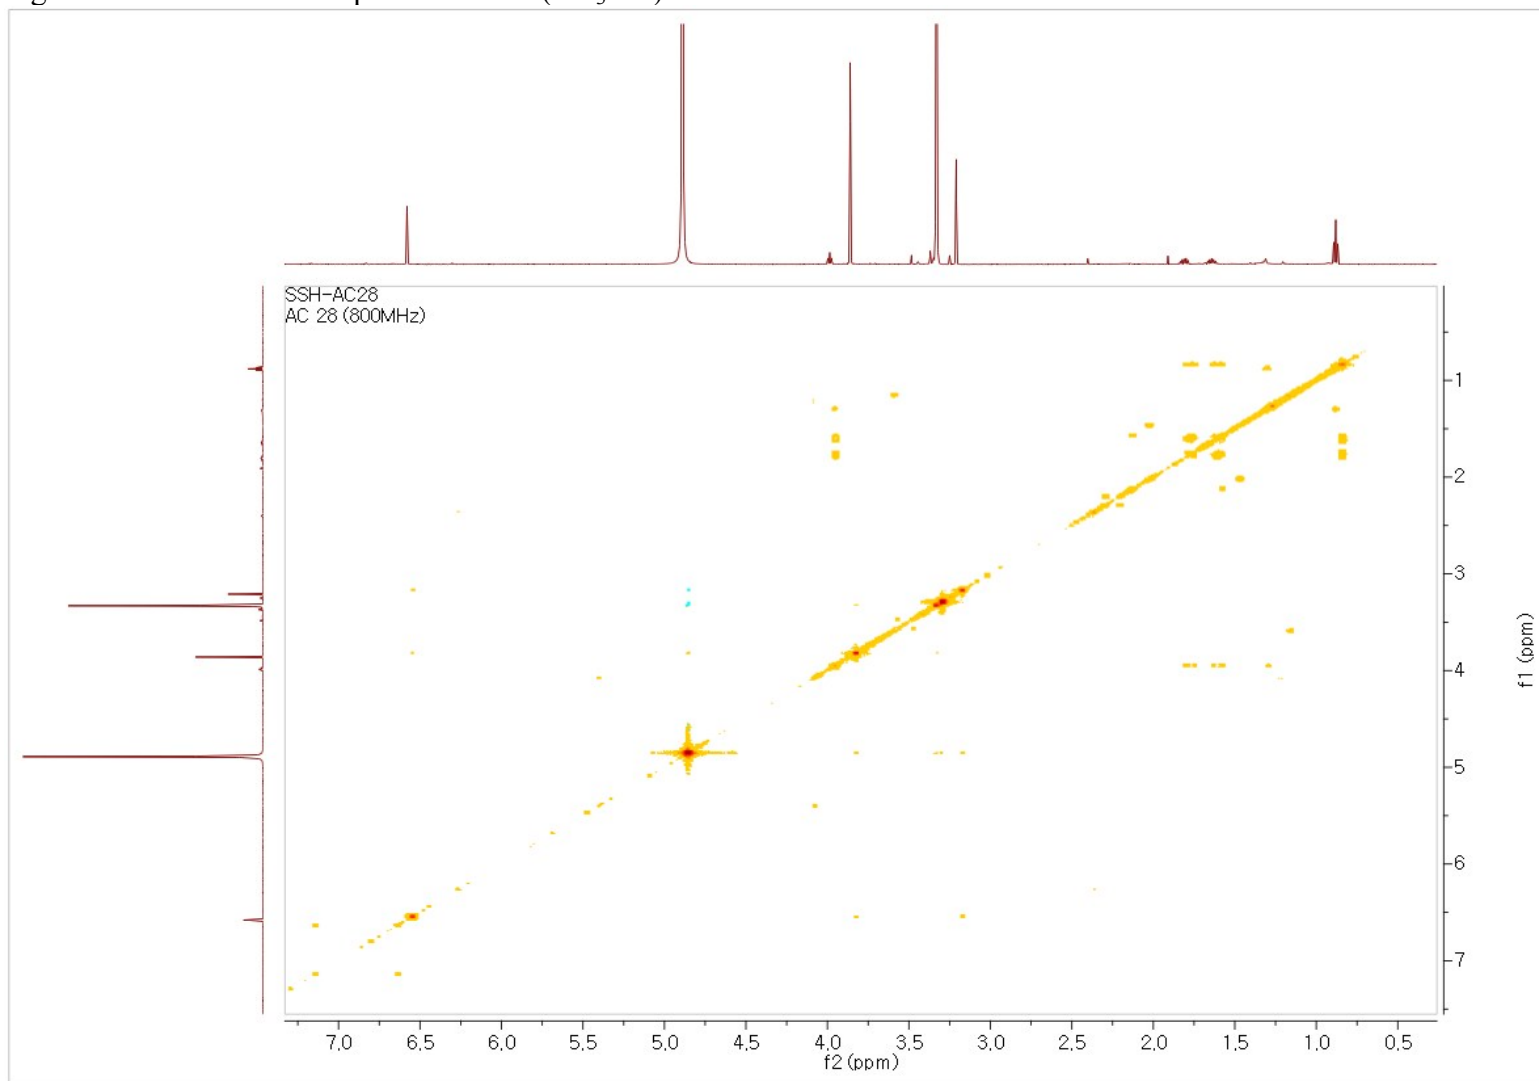



Figure S29. HSQC spectrum of **11** (CD<sub>3</sub>OD)

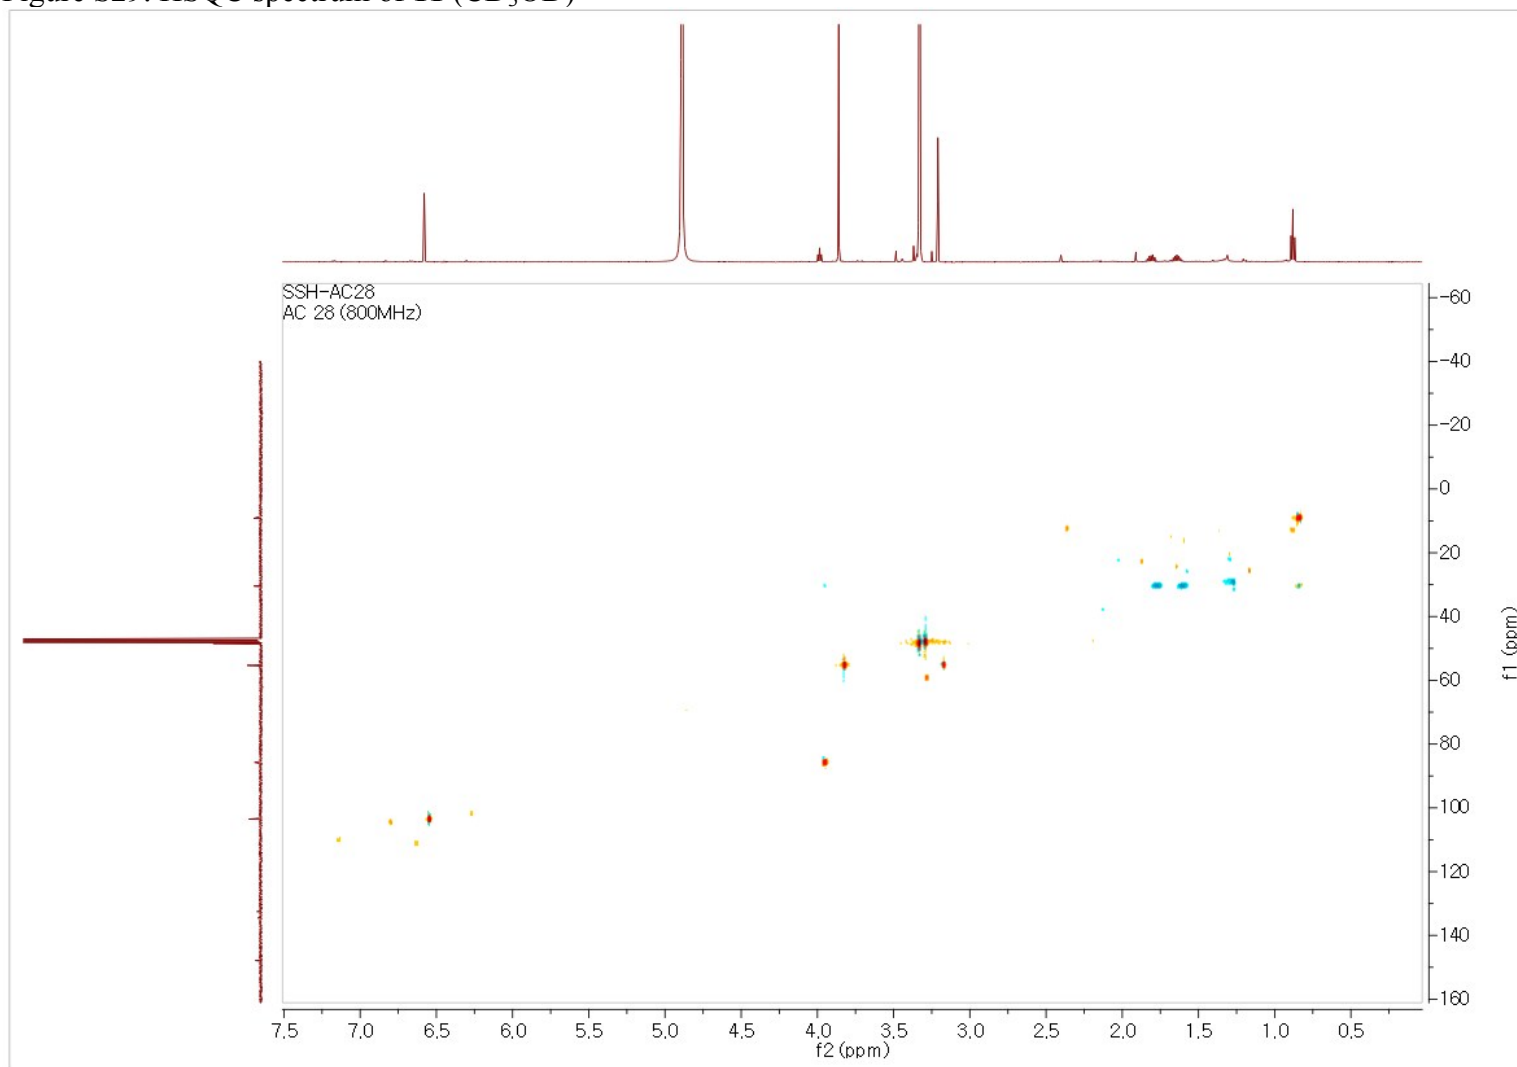

Figure S30. HMBC spectrum of **11** (CD<sub>3</sub>OD)

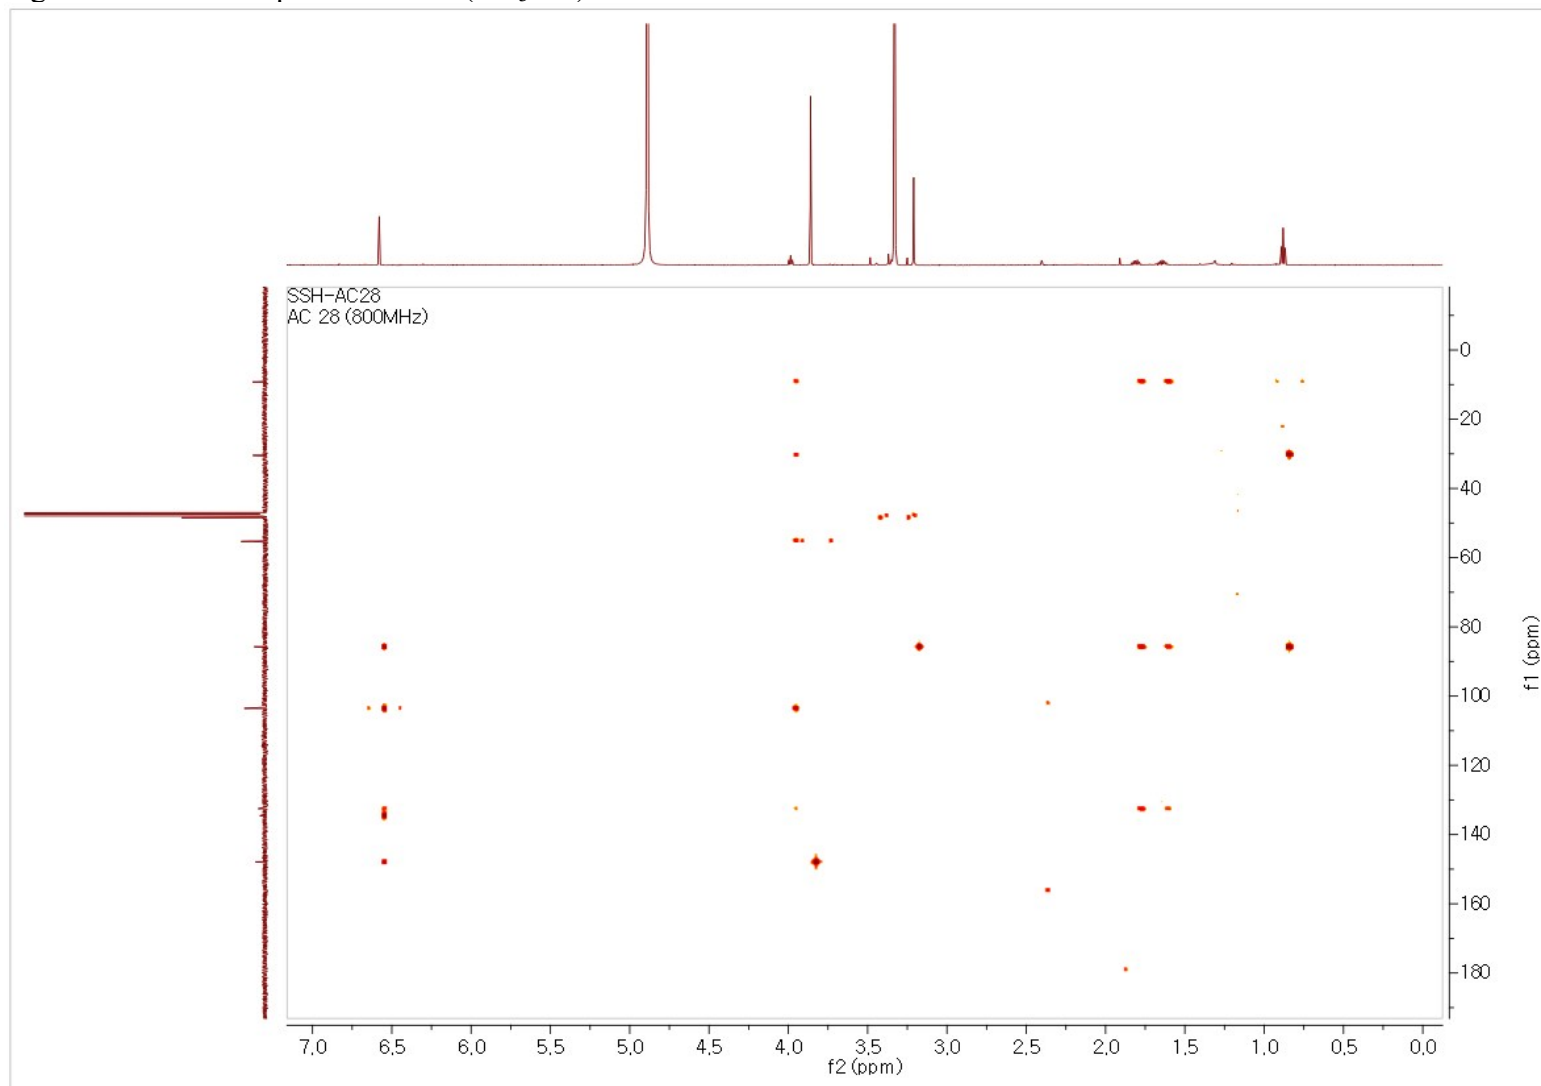

Figure S31. Amino acid sequence alignment of human SPHK1(PDB id : 3VZD) and human SPHK2 using the homology modeling module embedded in the Schrodinger Maestro 11.6 software.

```

AAH10671_1  MAPPPLAASTPLLHGEGSYVARGPRFALTLTSQALHIQRLRPKPEARPRGGLVPLAE 60
3VZD_C      -----0

AAH10671_1  VSGCCTLRSRSPSDSAAYFCIVTYPRGRRGARRRATRTFRADGAATVEENRAEAQRWATA 120
3VZD_C      -----0

AAH10671_1  LTCLLRGLPLPGDGEITPDLLPRPPRLLLVNPFGGRGLAWQWCKNHVLPIMSEAGLSFN 180
3VZD_C      -----47
                -----GAMGSGVLRPCRVLYLLNPRGGKQKALQLFRSHVQPLLAEEISFT
                * : .:***** *:!:*** **!* * * :,** *::** !**

AAH10671_1  LIQTERQNHARELYQGLSLSEWDGIVTYSGDGLLHEVLNGLLDRPDWEEAVKMPVGI LPC 240
3VZD_C      LMLTERRNHARELYRSEELGRWDALVYMSGDGLMHEVYVNGLMERPDWETAIQKPLCSLPA 107
                *! ***:*****:, ,*,**,*:,*****:***:***:***** *:: *! **,

AAH10671_1  GSGNALAGAVNQHGGEFEPALGLDLLNCSLLLCRGGGHPDLLSVTLASGSRCSFSLVA 300
3VZD_C      GSGNALAASLNHYAGVEQVTNEDLLTNCTLLLCRRLSPMNLSSLHTASGLRFLFSVLSLA 167
                *****,:!::,* * , , *** **!***** *!****: *** * **,**!

AAH10671_1  WGFVSDYDIQSERFRALGSARFTLGTVLGLATLHTYRGRLSYLPATVEPASPTPAHSLPR 360
3VZD_C      WGFADVLESEKYRRLGEMRFTLGTFLRLAALRTYRGRLAYLPVG-----213
                ***:***:***:!* **, *****,* **!******:***,

AAH10671_1  AKSELTLPDPAPMAHSPHRSVSDLPPLPQPALASPGSPEPLPILSLNGGGPELAGD 420
3VZD_C      -----213

AAH10671_1  WGGAGDAPLSPDLLSSPPGSPKAALHSPVSEGAPVIPPSSGLPLPTDARVGAStCGPP 480
3VZD_C      -----RVGSKTPASPVVVR-----QGPPV 231
                ,* * ,* **

AAH10671_1  DHLLPPLGTPLPDWV-TLEGDFVLMIAISPSHLGADLYAAPHARFDDGLVHLCWVRSGL 539
3VZD_C      DAHLVPLEEPVPSHWTVVPOEDFVVLALLHSHLGSEMFAAPMGRCAAGVMHLFVYRAGV 291
                * * ** *!* ,* , : *****! : *****:*** ,* *!*** !**!

AAH10671_1  SRAALLRLFLAMERGSFSLGCPQLGYAAARAFRLEPLTPRGVLTVDGEQVEYGPLQAQM 599
3VZD_C      SRAMLLRLFLAMEKGRHMEVECPVLYVYVVAFRLEPKDGKGVFAVDGELMVSEAVQGQV 351
                *** *****!* *!, ** * * , ***** !**!***** : !*,:

AAH10671_1  HPGIGTLLTGPPGCPGREP 618
3VZD_C      HPNVFWMVSG-----361
                **, :!:*

```
